# Supplementary material
Source: publisher site journal article supplement (https://www.dovepress.com/article/487629)
Supplement: Supplementary file 1 [file get_supplementary_file.php]

**Supplementary Appendix**

This document has been provided by the authors to give readers additional information about their work.

Supplement: **Postinduction Hypotension and Adverse Outcomes in Older Adults Undergoing Transcatheter Aortic Valve Replacement: A Retrospective Cohort Study**

**Figure S1:** Cumulative duration of >20% MAP drop in patients undergoing TAVR: A, postinduction hypotension; B, intraoperative hypotension

**Figure S2:** Cumulative duration of MAP < 65 mmHg in patients undergoing TAVR: A, postinduction hypotension; B, intraoperative hypotension

**Figure S3:** Propensity score distribution for a >20% MAP drop: patients with PIH vs. without PIH before matching (Figure S3A) and after inverse probability treatment weighting (Figure S3B)

**Figure S4:** Propensity score distribution for MAP < 65 mmHg: patients with PIH vs. without PIH before matching (Figure S4A) and after inverse probability treatment weighting (Figure S4B)

**Figure S5:** Propensity score distribution for >20% MAP decrease: patients with PIH vs. without PIH before matching (Figure S5A) and after propensity score matching (Figure S5B)

**Figure S6:** Propensity score distribution for >30% MAP decrease: patients with PIH vs. without PIH before matching (Figure S6A) and after propensity score matching (Figure S6B)

**Figure S7:** Propensity score distribution for MAP < 65 mmHg: patients with PIH vs. without PIH before matching (Figure S7A) and after propensity score matching (Figure S7B)

**Figure S8:** Propensity score distribution for MAP < 60 mmHg: patients with PIH vs. without PIH before matching (Figure S8A) and after propensity score matching (Figure S8B)

**Figure S9:** Standardized mean differences for >20% MAP drop from baseline (unmatched vs. matched)

**Figure S10:** Standardized mean differences for >30% MAP drop from baseline (unmatched vs. matched)

**Figure S11:** Standardized mean differences for MAP < 65 mmHg (unmatched vs. matched)

**Figure S12:** Standardized mean differences for MAP < 60 mmHg (unmatched vs. matched)

**Table S1:** Definition of outcomes in the study

**Table S2:** Baseline characteristics before IPTW for MAP >20% drop from baseline and <65 mmHg

**Table S3:** Baseline characteristics after IPTW for MAP >20% drop from baseline and <65 mmHg

**Table S4:** Baseline characteristics before PSM

**Table S5:** Baseline characteristics after PSM

**Table S6:** Associations between PIH and composite outcome components in the crude and propensity score analyses

**Table S7:** Associations between PIH duration and composite outcome for MAP >20% from baseline and <65 mmHg

**Table S8:** Multivariable regression analysis of risk factors for composite outcome in patients with a decrease in MAP >20% from baseline

**Table S9:** Multivariable regression analysis of risk factors for composite outcomes in patients whose MAP decreased >30% from baseline

**Table S10:** Multivariable regression analysis of risk factors for composite outcome in MAP <65 mmHg

**Table S11:** Multivariable regression analysis of risk factors for composite outcome in MAP <60 mmHg

**Figure S1:** Cumulative duration of >20% MAP drop in patients undergoing TAVR: A, postinduction hypotension; B, intraoperative hypotension


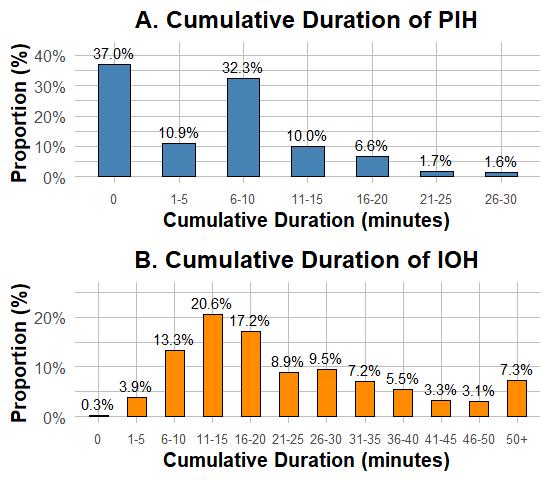


**TAVR**: Transcatheter aortic valve replacement; **MAP**: Mean arterial pressure; **IOH**: Intraoperative hypotension; **PIH**:Postinduction hypotension.

**Figure S2:** Cumulative duration of MAP < 65 mmHg in patients undergoing TAVR: A, postinduction hypotension; B, intraoperative hypotension


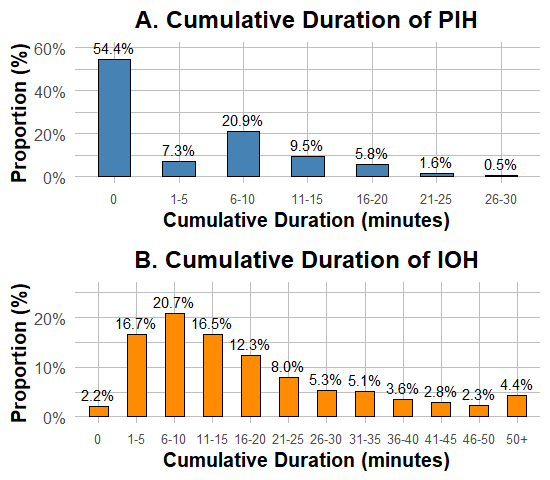


**TAVR**: Transcatheter aortic valve replacement; **MAP**: Mean arterial pressure; **IOH**: Intraoperative hypotension; **PIH**:Postinduction hypotension.

**Figure S3:** Propensity score distribution for a >20% MAP drop: patients with PIH vs. without PIH before matching (Figure S3A) and after inverse probability treatment weighting (Figure S3B)


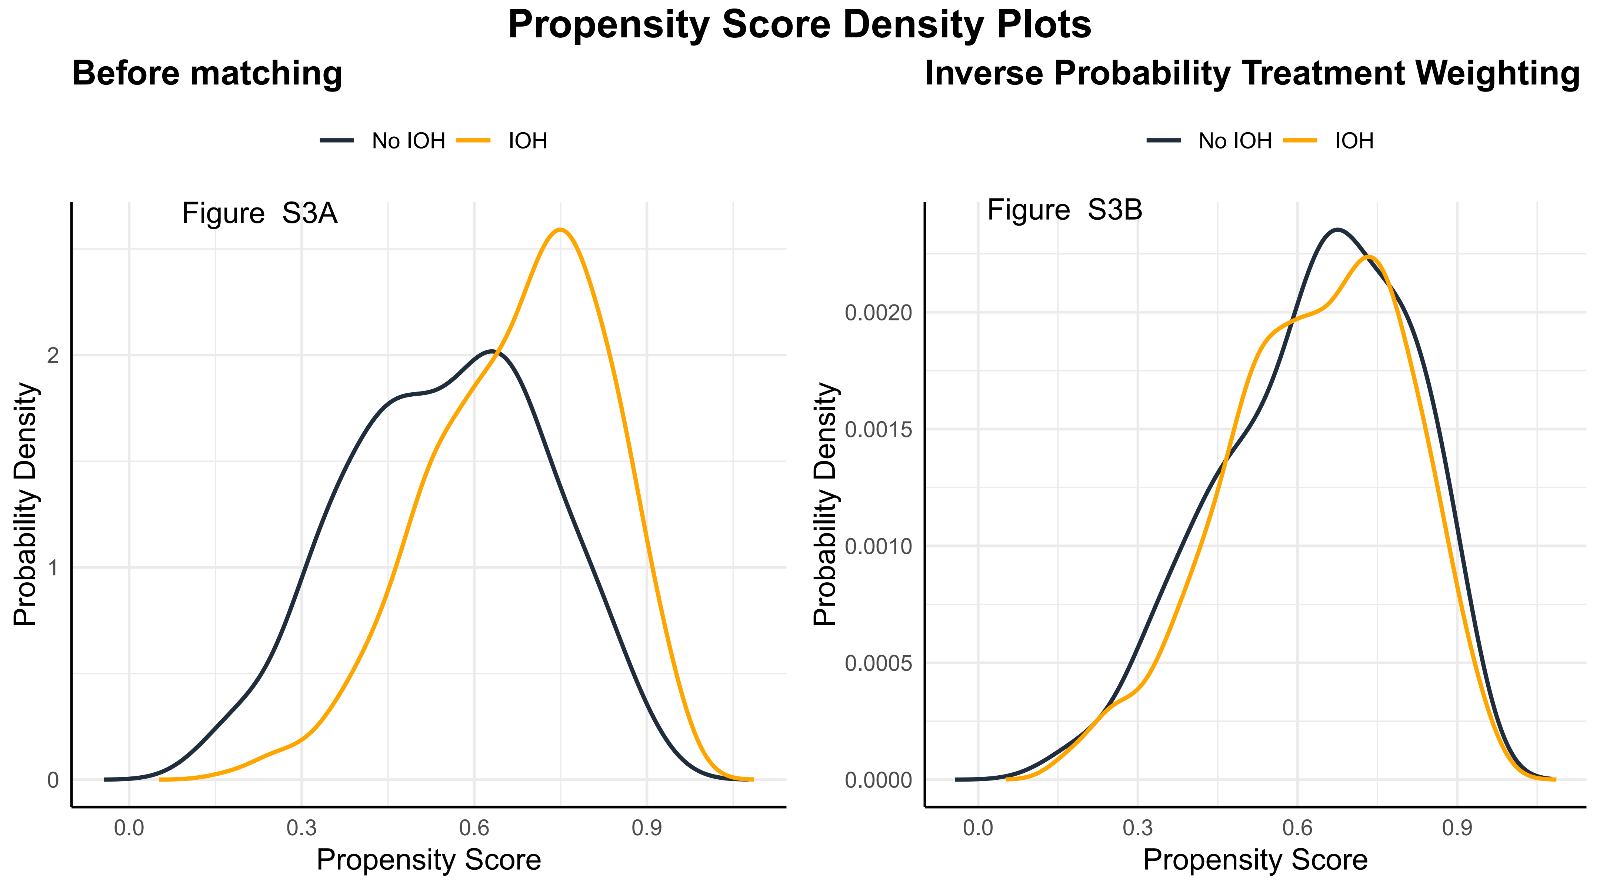


**MAP**: Mean arterial pressure; **PIH**:Postinduction hypotension.

**Figure S4:** Propensity score distribution for MAP < 65 mmHg: patients with PIH vs. without PIH before matching (Figure S4A) and after inverse probability treatment weighting (Figure S4B)


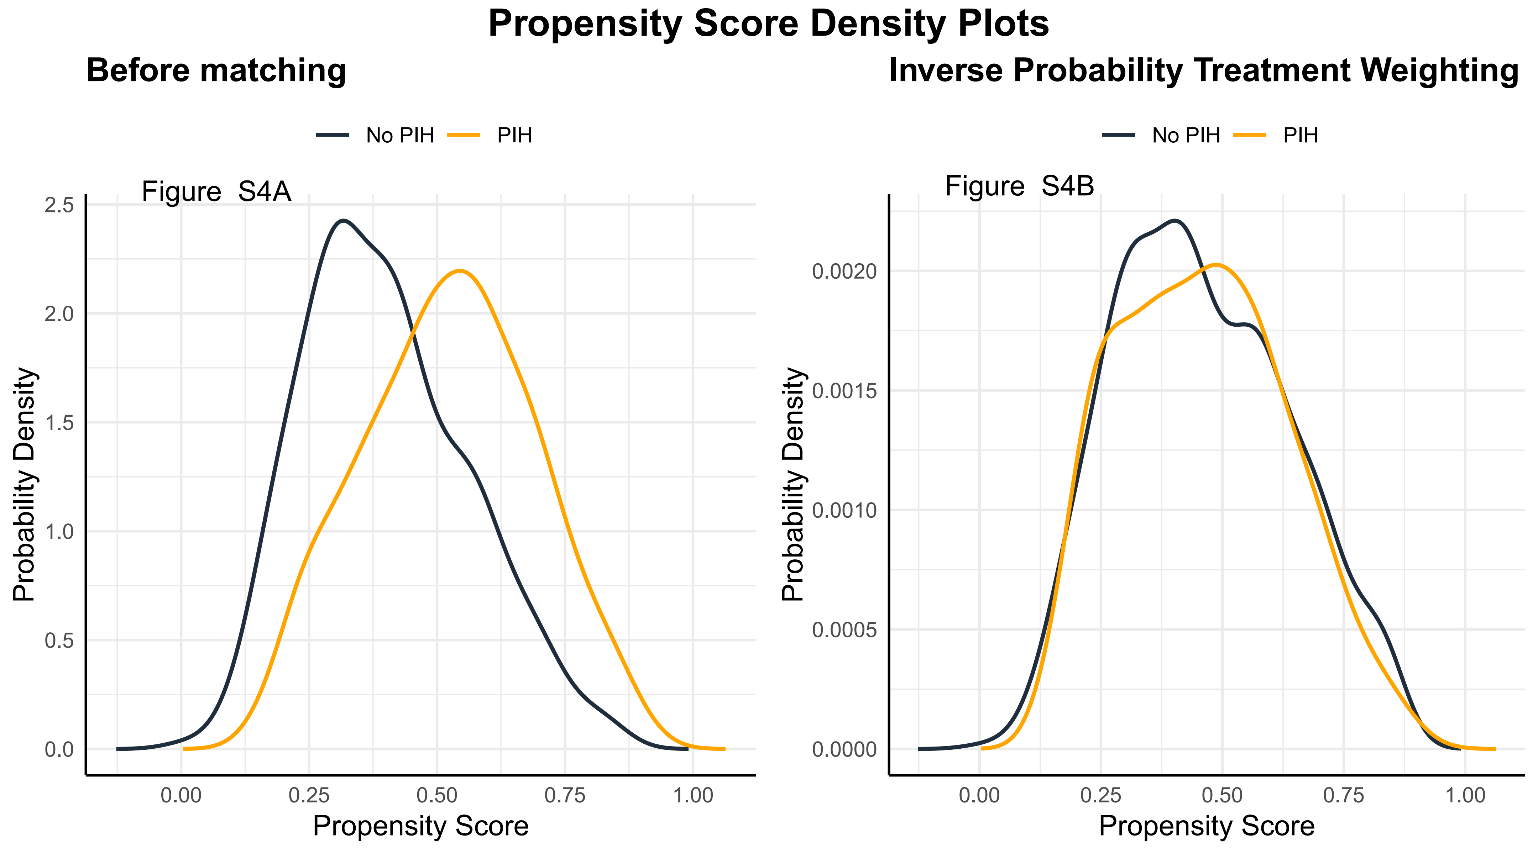


**MAP**: Mean arterial pressure; **PIH**:Postinduction hypotension.

**Figure S5:** Propensity score distribution for >20% MAP decrease: patients with PIH vs. without PIH before matching (Figure S5A) and after propensity score matching (Figure S5B)


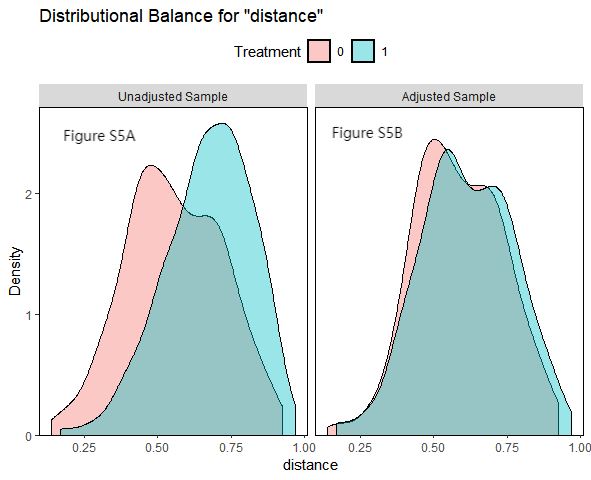


**MAP**: Mean arterial pressure; **PIH**:Postinduction hypotension; **PSM**: Propensity score matching.

**Figure S6:** Propensity score distribution for >30% MAP decrease: patients with PIH vs. without PIH before matching (Figure S6A) and after propensity score matching (Figure S6B)


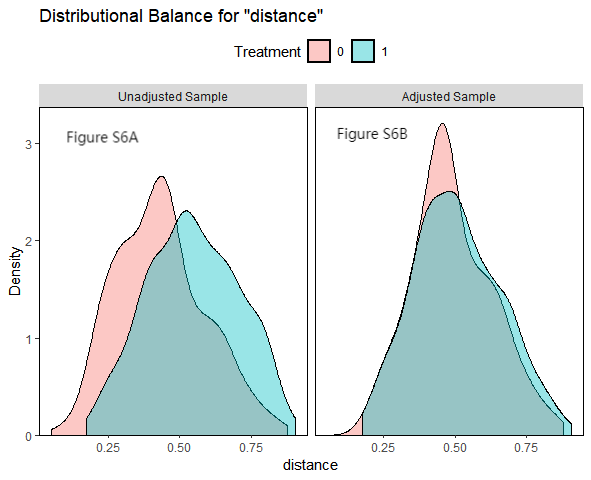


**MAP**: Mean arterial pressure; **PIH**:Postinduction hypotension; **PSM**: Propensity score matching.

**Figure S7:** Propensity score distribution for MAP < 65 mmHg: patients with PIH vs. without PIH before matching (Figure S7A) and after propensity score matching (Figure S7B)


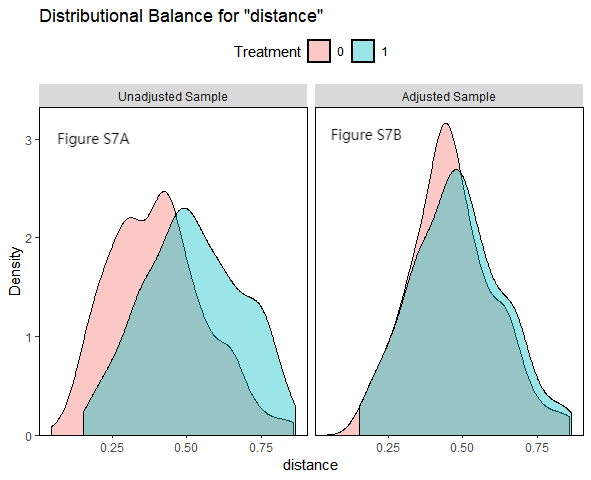


**MAP**: Mean arterial pressure; **PIH**:Postinduction hypotension; **PSM**: Propensity score matching.

**Figure S8:** Propensity score distribution for MAP < 60 mmHg: patients with PIH vs. without PIH before matching (Figure S8A) and after propensity score matching (Figure S8B)


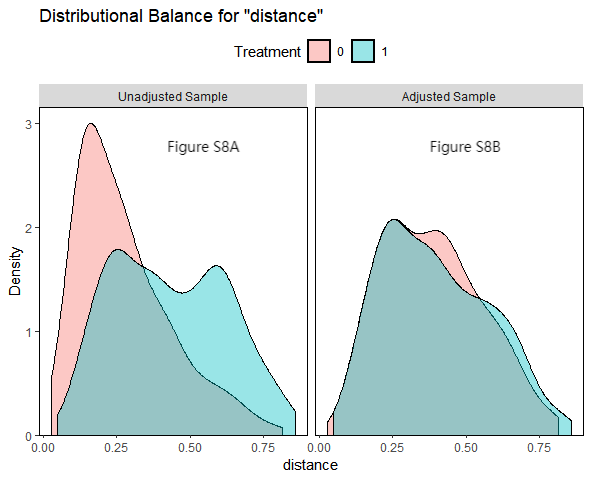


**MAP**: Mean arterial pressure; **PIH**:Postinduction hypotension; **PSM**: Propensity score matching.

**Figure S9:** Standardized mean differences for >20% MAP drop from baseline (unmatched vs. matched)


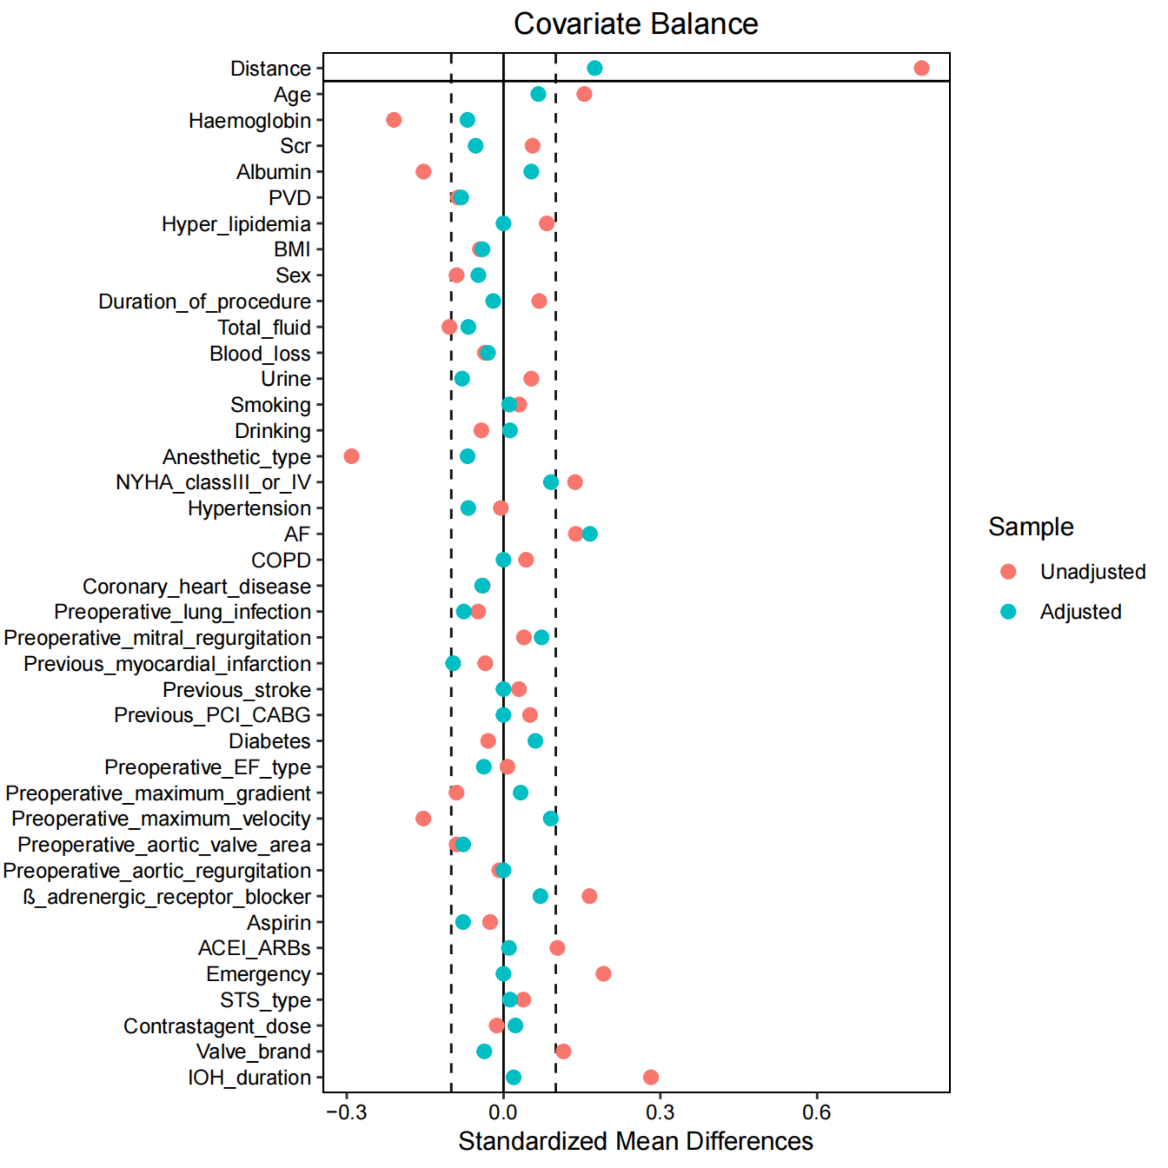


**MAP**: Mean arterial pressure.

**Figure S10:** Standardized mean differences for >30% MAP drop from baseline (unmatched vs. matched)


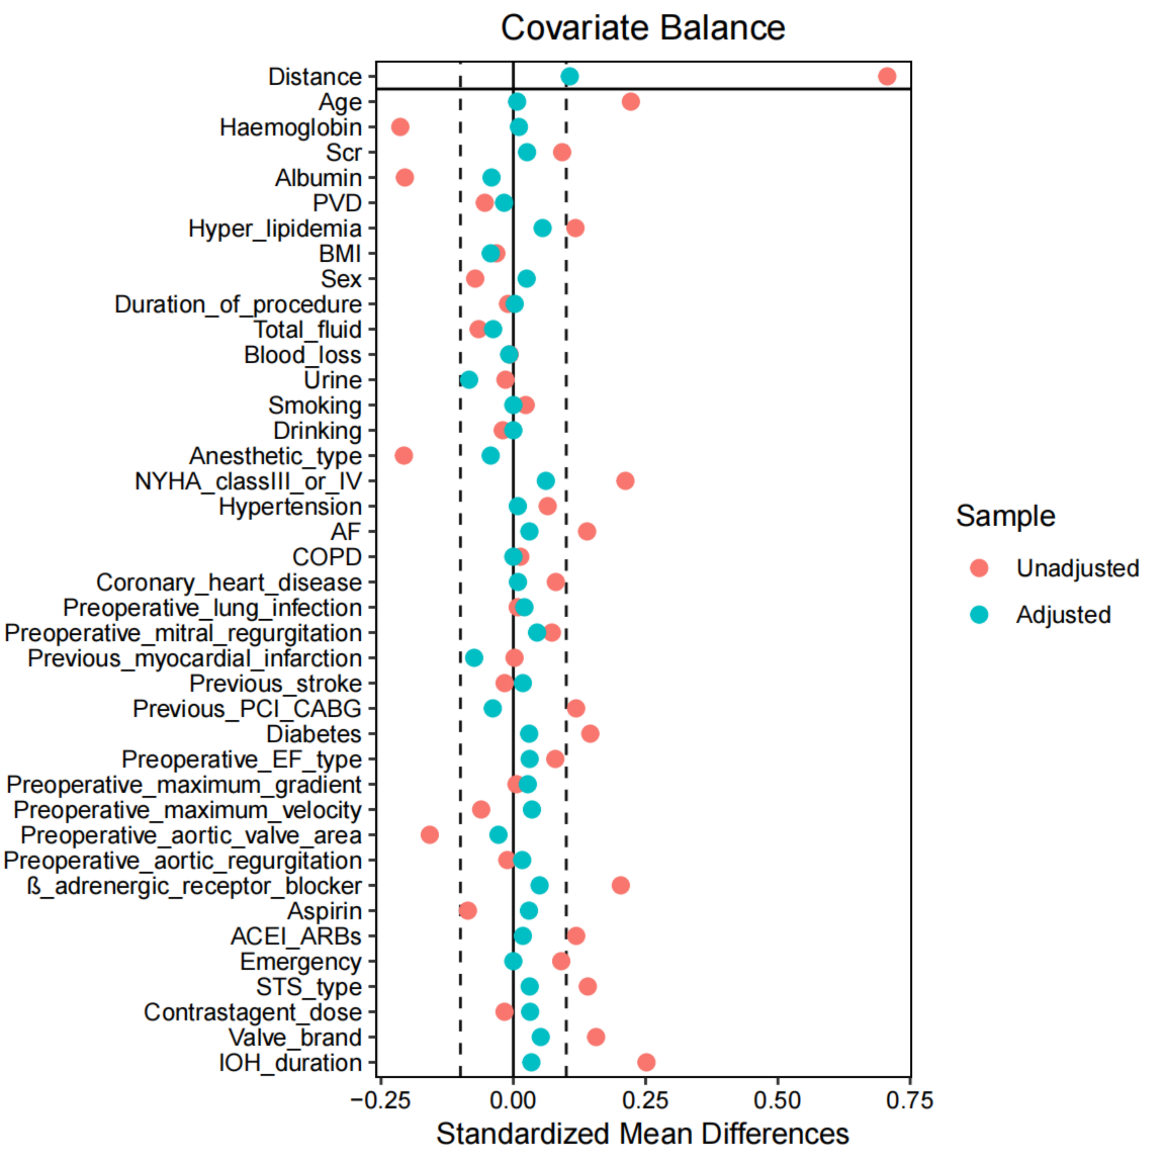


**MAP**: Mean arterial pressure.

**Figure S11:** Standardized mean differences for MAP < 65 mmHg (unmatched vs. matched)


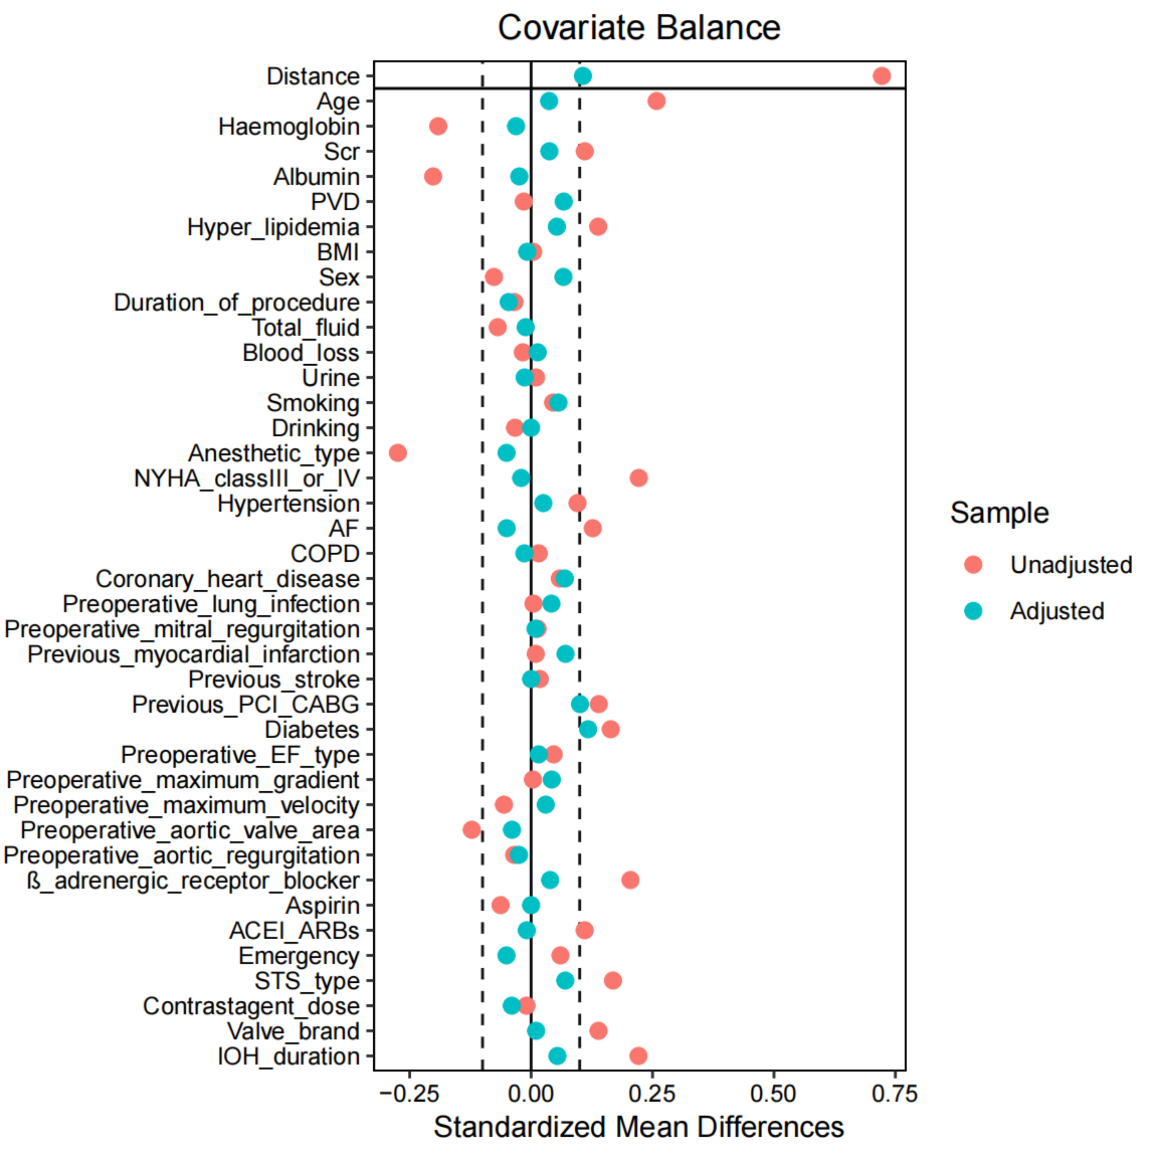


**MAP**: Mean arterial pressure.

**Figure S12:** Standardized mean differences for MAP < 60 mmHg (unmatched vs. matched)


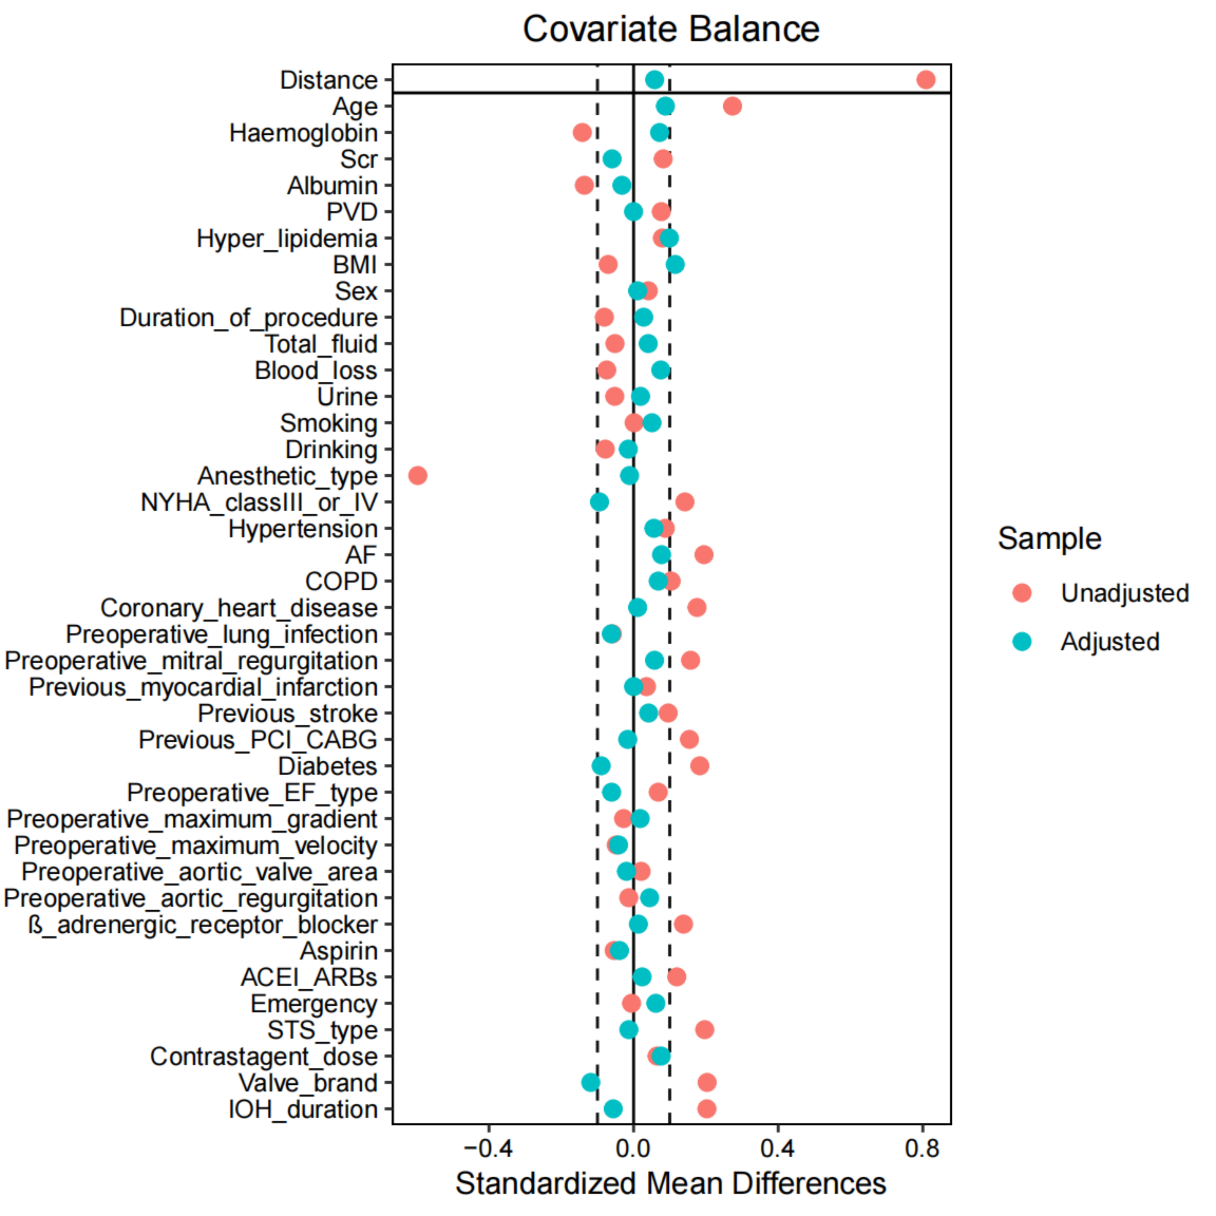


**MAP**: Mean arterial pressure.

**Table S1:** Definition of study outcomes

| **Outcome** | **Definition and unit of measurement** |
| --- | --- |
| All-cause mortality | Death due to any cause occurring at any time from the end of surgery until hospital discharge. |
| Myocardial infarction | **In patients with normal baseline creatine kinase-MB (CK-MB)**, the peak CK-MB measured within 48 hours of the procedure was ≥10 times the local laboratory upper limit of normal (ULN) or ≥5 times the ULN with one or more of the following: new pathologic Q-waves in ≥2 contiguous leads, new persistent left bundle branch block (LBBB), flow-limiting angiographic complications in a major epicardial vessel or a branch >1.5 mm in diameter, or substantial new loss of viable myocardium on imaging related to the procedure.  **In the absence of CK-MB measurements and with a normal baseline cardiac troponin (cTn),** a cTn (I or T) level measured within 48 hours of the procedure rises to ≥70 times the local laboratory ULN or ≥35 times the ULN with one or more of the aforementioned criteria. In patients with elevated baseline CK-MB (or cTn), the CK-MB (or cTn) rises by an absolute increment equal to those levels recommended above from the most recent preprocedure level, accompanied by new electrocardiogram (ECG) changes as described. |
| Stroke | Ischaemic stroke: acute onset of focal neurological signs or symptoms aligning with a specific vascular territory in the brain, spinal cord, or retina that meets one of the following criteria: signs or symptoms lasting 24 hours or more, or until death, accompanied by pathology or neuroimaging evidence of central nervous system (CNS)infarction, with no other apparent causes; or symptoms lasting less than 24 hours, confirmed by pathology or neuroimaging of CNS infarction in the relevant vascular territory.  Haemorrhagic stroke: Acute onset of neurological signs or symptoms due to intracranial bleeding from intracerebral or subarachnoid haemorrhage not due to trauma. |
| Acute kidney injury (AKI) | AKI is classified into stages based on the severity of serum creatinine increase. Stage 1 AKI meets at least one of the following criteria: an increase in serum creatinine by 150–200% (1.5–2.0×) within 7 days compared with baseline, or an increase of ≥0.3 mg/dL (≥26.4 µmol/L) within 48 hours of the index procedure. Stage 2 AKI is defined by an increase in serum creatinine by >200–300% (>2.0–3.0×) within 7 days compared with baseline. Stage 3 AKI meets at least one of the following criteria: an increase in serum creatinine by >300% (>3.0×) within 7 days compared with baseline, or serum creatinine ≥4.0 mg/dL (≥354 µmol/L) with an acute increase of ≥0.5 mg/dL (≥44 µmol/L). Stage 4 AKI involves the need for new temporary or permanent renal replacement therapy. |
| New-onset Postoperative Atrial Fibrillation | Any arrhythmia not present at baseline, exhibiting the ECG characteristics of atrial fibrillation (or flutter) and lasting long enough to be captured on a 12-lead ECG or for at least 30 seconds on a rhythm strip. |
| Conversion to open surgery | Conversion to open sternotomy or thoracotomy using cardiopulmonary bypass secondary to any procedure-related complication or failed intended transcatheter approach. |

**CNS**: Central nervous system; **CK-MB**: Creatine Kinase-MB; **cTn**: Cardiac troponin; **AKI**: Acute kidney injury; **ULN**: upper limit of normal; **ECG**: Electrocardiogram.

**Table S2:** Baseline characteristics before IPTW for MAP >20% drop from baseline and <65 mmHg

|  |  | | **MAP>20% drop from baseline** | | | **MAP <65 mmHg** | | |
| --- | --- | --- | --- | --- | --- | --- | --- | --- |
| **Covariate** | **Total incidence (n=643)** | | **No postinduction hypotension (n=238)** | **Postinduction hypotension (n=405)** | **SMD** | **No postinduction hypotension (n=350)** | **Postinduction hypotension (n=293)** | **SMD** |
| Age (years), mean (SD) | 74.56 (7.07) | | 73.88 (7.21) | 74.96 (6.97) | 0.152 | 73.74 (7.11) | 75.53 (6.91) | 0.255 |
| Male, n(%) | 272 (42.3) | | 94 (39.5) | 178 (44.0) | 0.09 | 142 (40.6) | 130 (44.4) | 0.077 |
| BMI(kg/m²), mean (SD) | 22.72 (3.46) | | 22.82 (3.61) | 22.67 (3.37) | 0.044 | 22.72 (3.49) | 22.73 (3.43) | 0.004 |
| Smoking , n(%) | 162 (25.2) | | 58 (24.4) | 104 (25.7) | 0.03 | 85 (24.3) | 77 (26.3) | 0.046 |
| Drinking, n (%) | 123 (19.1) | | 48 (20.2) | 75 (18.5) | 0.042 | 69 (19.7) | 54 (18.4) | 0.033 |
| Hypertension, n(%) | 361 (56.1) | | 134 (56.3) | 227 (56.0) | 0.005 | 189 (54.0) | 172 (58.7) | 0.095 |
| Diabetes, n(%) | 125 (19.4) | | 48 (20.2) | 77 (19.0) | 0.029 | 57 (16.3) | 68 (23.2) | 0.175 |
| Atrial fibrillation, n(%) | 120 (18.7) | | 36 (15.1) | 84 (20.7) | 0.147 | 57 (16.3) | 63 (21.5) | 0.134 |
| Peripheral vascular disease, n(%) | 43 (6.7) | | 19 (8.0) | 24 (5.9) | 0.081 | 24 (6.9) | 19 (6.5) | 0.015 |
| COPD, n(%) | 62 (9.6) | | 21 (8.8) | 41 (10.1) | 0.044 | 33 (9.4) | 29 (9.9) | 0.016 |
| Coronary heart disease, n(%) | 214 (33.3) | | 82 (34.5) | 132 (32.6) | 0.039 | 112 (32.0) | 102 (34.8) | 0.06 |
| Renal failure, n(%) | 11 (1.7) | | 4 (1.7) | 7 (1.7) | 0.004 | 4 (1.1) | 7 (2.4) | 0.095 |
| Preoperative pulmonary infection, n(%) | 26 (4.0) | | 11 (4.6) | 15 (3.7) | 0.046 | 14 (4.0) | 12 (4.1) | 0.005 |
| Previous myocardial infarction, n(%) | 2 (0.3) | | 1 (0.4) | 1 (0.2) | 0.03 | 1 (0.3) | 1 (0.3) | 0.01 |
| Preoperative hydrothorax, n(%) | 24 (3.7) | | 12 (5.0) | 12 (3.0) | 0.106 | 13 (3.7) | 11 (3.8) | 0.002 |
| Previous stroke, n(%) | 38 (5.9) | | 13 (5.5) | 25 (6.2) | 0.03 | 20 (5.7) | 18 (6.1) | 0.018 |
| History of PCI/CABG , n(%) | 63 (9.8) | | 21 (8.8) | 42 (10.4) | 0.053 | 27 (7.7) | 36 (12.3) | 0.153 |
| Preoperative ejection fraction <35%, n(%) | 44 (6.8) | | 16 (6.7) | 28 (6.9) | 0.008 | 22 (6.3) | 22 (7.5) | 0.048 |
| Preoperative mean gradient(mmHg), median [IQR] | 45.00 [34.00, 63.00] | | 48.00 [34.25, 64.00] | 44.00 [34.00, 60.00] | 0.068 | 46.00 [35.00, 63.00] | 45.00 [34.00, 60.00] | 0.08 |
| Preoperative maximum gradient(mmHg), median [IQR] | 80.00 [64.00, 104.00] | | 85.50 [66.25, 108.00] | 78.00 [62.00, 102.00] | 0.089 | 80.00 [65.00, 104.75] | 80.00 [62.00, 102.00] | 0.004 |
| Preoperative maximum velocity(m/s), median [IQR] | 4.46 [4.00, 5.11] | | 4.64 [4.07, 5.22] | 4.40 [3.95, 5.04] | 0.109 | 4.50 [4.03, 5.19] | 4.41 [3.91, 5.04] | 0.049 |
| Preoperative aortic valve area (cm²), median [IQR] | 0.70 [0.52, 0.88] | | 0.67 [0.53, 0.88] | 0.72 [0.51, 0.88] | 0.079 | 0.70 [0.53, 0.90] | 0.71 [0.50, 0.88] | 0.111 |
| Aortic regurgitation(moderate/severe), n(%) | 355 (55.2) | | 132 (55.5) | 223 (55.1) | 0.008 | 196 (56.0) | 159 (54.3) | 0.035 |
| Mitral regurgitation(moderate/severe), n(%) | | 191 (29.7) | 68 (28.6) | 123 (30.4) | 0.039 | 103 (29.4) | 88 (30.0) | 0.069 |
| β adrenergic receptor blocker, n(%) | 119 (18.5) | | 34 (14.3) | 85 (21.0) | 0.177 | 51 (14.6) | 68 (23.2) | 0.222 |
| Aspirin, n(%) | 163 (25.3) | | 62 (26.1) | 101 (24.9) | 0.026 | 93 (26.6) | 70 (23.9) | 0.062 |
| Anticoagulant, n(%) | 48 (7.5) | | 14 (5.9) | 34 (8.4) | 0.098 | 21 (6.0) | 27 (9.2) | 0.121 |
| ACEI/ARBs, n(%) | 184 (28.6) | | 61 (25.6) | 123 (30.4) | 0.106 | 92 (26.3) | 92 (31.4) | 0.113 |
| Hypolipidaemic drug, n(%) | 234 (36.4) | | 80 (33.6) | 154 (38.0) | 0.092 | 122 (34.9) | 112 (38.2) | 0.07 |
| Diuretics,n(%) | 181 (28.1) | | 74 (31.1) | 107 (26.4) | 0.103 | 106 (30.3) | 75 (25.6) | 0.105 |
| Preoperative NYHA functional class III/IV, n(%) | 480 (74.7) | | 169 (71.0) | 311 (76.8) | 0.132 | 247 (70.6) | 233 (79.5) | 0.208 |
| STS score>7%, n(%) | 114 (17.7) | | 40 (16.8) | 74 (18.3) | 0.039 | 51 (14.6) | 63 (21.5) | 0.181 |
| Haemoglobin (g/dL), mean (SD) | 124.11 (20.19) | | 126.73 (20.49) | 122.56 (19.88) | 0.206 | 125.90 (19.72) | 121.97 (20.57) | 0.195 |
| Scr(μmol/L), median [IQR] | 76.10 [62.00, 94.35] | | 75.00 [61.00, 90.75] | 77.10 [63.10, 96.00] | 0.061 | 76.00 [62.00, 90.00] | 77.00 [62.60, 98.50] | 0.134 |
| Albumin(g/L), median [IQR] | 36.50 [34.20, 38.60] | | 36.70 [34.82, 39.00] | 36.20 [34.00, 38.40] | 0.162 | 36.70 [34.60, 38.90] | 36.00 [33.60, 38.30] | 0.214 |
| Emergency, n(%) | 21 (3.3) | | 12 (5.0) | 9 (2.2) | 0.151 | 13 (3.7) | 8 (2.7) | 0.056 |
| Valve brand, n (%) |  | |  |  |  |  |  |  |
| Self-expanding | 533 (82.9) | | 204 (85.7) | 329 (81.2) | 0.121 | 299 (85.4) | 234 (79.9) | 0.147 |
| Balloon-expandable | 110 (17.1) | | 34 (14.3) | 76 (18.8) |  | 51 (14.6) | 59 (20.1) |  |
| Type of anaesthesia |  | |  |  |  |  |  |  |
| GA | 214 (33.3) | | 58 (24.4) | 156 (38.5) | 0.308 | 95 (27.1) | 119 (40.6) | 0.288 |
| Deep sedation | 429 (66.7) | | 180 (75.6) | 249 (61.5) |  | 255 (72.9) | 174 (59.4) |  |
| Duration of procedure(min), median [IQR] | 100.00 [80.00, 125.00] | | 100.00 [80.00, 125.00] | 100.00 [80.00, 125.00] | 0.07 | 100.00 [80.00, 125.00] | 95.00 [80.00, 120.00] | 0.035 |
| Duration of intraoperative hypotension(min), median [IQR] | - | | 16.00 [10.00, 27.00] | 20.00 [13.00, 34.00] | 0.295 | 17.00 [11.00, 30.00] | 21.00 [14.00, 34.00] | 0.234 |
| Total fluid(mL), median [IQR] | 1500.00 [1000.00, 1500.00] | | 1500.00 [1000.00, 1500.00] | 1500.00 [1000.00, 1500.00] | 0.109 | 1500.00 [1000.00, 1500.00] | 1500.00 [1000.00, 1500.00] | 0.07 |
| Blood loss(mL), median [IQR] | 50.00 [50.00, 50.00] | | 50.00 [50.00, 50.00] | 50.00 [50.00, 50.00] | 0.042 | 50.00 [50.00, 50.00] | 50.00 [50.00, 50.00] | 0.021 |
| Urine(mL), median [IQR] | 300.00 [200.00, 500.00] | | 300.00 [200.00, 500.00] | 400.00 [200.00, 500.00] | 0.054 | 300.00 [200.00, 500.00] | 400.00 [200.00, 500.00] | 0.01 |
| Contrast (mL), median [IQR] | 100.00 [90.00, 120.00] | | 100.00 [90.00, 120.00] | 100.00 [90.00, 120.00] | 0.015 | 100.00 [90.00, 120.00] | 100.00 [90.00, 120.00] | 0.011 |

**SD:** Standard deviation; **IQR:** Interquartile range; **IPTW:** inverse probability of treatment weighting; **MAP:** mean arterial pressure; **BMI:** body mass index; **COPD:** chronic obstructive pulmonary disease; **PCI:** percutaneous coronary intervention; **CABG:** coronary artery bypass grafting; **NYHA:** New York Heart Association; **STS:** Society of Thoracic Surgeons; **GA:** general anaesthesia; **SMD:** Standardized mean difference.

**Table S3:** Baseline characteristics after IPTW for MAP >20% drop from baseline and <65 mmHg

|  | **MAP>20% drop from baseline** | | | **MAP <65 mmHg** | | |
| --- | --- | --- | --- | --- | --- | --- |
| **Covariate** | **No postinduction hypotension (n=647.55)** | **Postinduction hypotension (n=639.87)** | **SMD** | **No postinduction hypotension (n=648.97)** | **Postinduction hypotension (n=637.58)** | **SMD** |
| Age (years), mean (SD) | 74.20 (7.42) | 74.72 (7.01) | 0.072 | 74.77 (7.42) | 74.65 (7.10) | 0.016 |
| Male, n(%) | 252.2 (38.9) | 266.5 (41.7) | 0.055 | 274.3 (42.3) | 276.0 (43.3) | 0.021 |
| BMI(kg/m²), mean (SD) | 22.76 (3.63) | 22.70 (3.37) | 0.015 | 22.72 (3.48) | 22.70 (3.41) | 0.007 |
| Smoking , n(%) | 182.3 (28.2) | 161.5 (25.2) | 0.066 | 159.7 (24.6) | 154.4 (24.2) | 0.009 |
| Drinking, n (%) | 145.0 (22.4) | 124.9 (19.5) | 0.071 | 130.0 (20.0) | 123.1 (19.3) | 0.018 |
| Hypertension, n(%) | 358.8 (55.4) | 357.9 (55.9) | 0.01 | 357.8 (55.1) | 349.1 (54.7) | 0.008 |
| Diabetes, n(%) | 128.8 (19.9) | 122.1 (19.1) | 0.02 | 126.1 (19.4) | 119.2 (18.7) | 0.019 |
| Atrial fibrillation, n(%) | 114.5 (17.7) | 118.1 (18.5) | 0.02 | 114.7 (17.7) | 113.4 (17.8) | 0.003 |
| Peripheral vascular disease, n(%) | 43.6 (6.7) | 41.9 (6.5) | 0.007 | 42.6 (6.6) | 38.5 (6.0) | 0.021 |
| COPD, n(%) | 57.6 (8.9) | 68.5 (10.7) | 0.061 | 56.9 (8.8) | 63.1 (9.9) | 0.039 |
| Coronary heart disease, n(%) | 222.0 (34.3) | 212.5 (33.2) | 0.023 | 215.0 (33.1) | 205.7 (32.3) | 0.019 |
| Renal failure, n(%) | 8.9 (1.4) | 10.6 (1.6) | 0.022 | 8.4 (1.3) | 10.1 (1.6) | 0.024 |
| Preoperative pulmonary infection, n(%) | 23.2 (3.6) | 24.2 (3.8) | 0.011 | 25.3 (3.9) | 24.7 (3.9) | 0.001 |
| Previous myocardial infarction, n(%) | 1.2 (0.2) | 1.2 (0.2) | 0.001 | 1.2 (0.2) | 1.2 (0.2) | 0.001 |
| Preoperative hydrothorax, n(%) | 24.8 (3.8) | 24.9 (3.9) | 0.004 | 26.5 (4.1) | 24.2 (3.8) | 0.014 |
| Previous stroke, n(%) | 33.8 (5.2) | 37.4 (5.9) | 0.028 | 34.1 (5.3) | 31.9 (5.0) | 0.011 |
| History of PCI/CABG , n(%) | 71.4 (11.0) | 63.5 (9.9) | 0.036 | 70.4 (10.8) | 62.2 (9.8) | 0.036 |
| Preoperative ejection fraction <35%, n(%) | 43.2 (6.7) | 42.9 (6.7) | 0.001 | 48.4 (7.5) | 43.2 (6.8) | 0.027 |
| Preoperative mean gradient(mmHg), median [IQR] | 46.00 [32.89, 63.00] | 44.00 [33.00, 60.00] | 0.017 | 45.00 [32.47, 62.00] | 45.00 [30.00, 61.00] | 0.042 |
| Preoperative maximum gradient(mmHg), median [IQR] | 82.00 [65.40, 108.00] | 77.77 [62.00, 101.27] | 0.003 | 77.11 [64.00, 101.00] | 80.00 [59.11, 103.93] | 0.01 |
| Preoperative maximum velocity(m/s), median [IQR] | 4.50 [4.02, 5.21] | 4.39 [3.92, 5.04] | 0.024 | 4.42 [4.02, 5.10] | 4.42 [3.85, 5.09] | 0.034 |
| Preoperative aortic valve area (cm²), median [IQR] | 0.67 [0.53, 0.88] | 0.73 [0.52, 0.89] | 0.004 | 0.69 [0.54, 0.89] | 0.73 [0.51, 0.90] | 0.04 |
| Aortic regurgitation(moderate/severe), n(%) | 363.4 (56.1) | 357.1 (55.8) | 0.006 | 361.4 (55.7) | 365.4 (57.3) | 0.033 |
| Mitral regurgitation(moderate/severe), n(%) | 190.8 (29.5) | 189.1 (29.5) | 0.002 | 201.2 (31.0) | 180.2 (28.3) | 0.06 |
| β adrenergic receptor blocker, n(%) | 114.0 (17.6) | 118.8 (18.6) | 0.025 | 119.1 (18.3) | 118.6 (18.6) | 0.007 |
| Aspirin, n(%) | 159.3 (24.6) | 160.3 (25.1) | 0.01 | 153.3 (23.6) | 156.1 (24.5) | 0.02 |
| Anticoagulant, n(%) | 51.1 (7.9) | 47.7 (7.5) | 0.016 | 49.8 (7.7) | 49.4 (7.7) | 0.003 |
| ACEI/ARBs, n(%) | 193.4 (29.9) | 187.8 (29.3) | 0.011 | 186.2 (28.7) | 191.8 (30.1) | 0.03 |
| Hypolipidaemic drug, n(%) | 219.3 (33.9) | 226.8 (35.4) | 0.033 | 229.6 (35.4) | 227.1 (35.6) | 0.005 |
| Diuretics,n(%) | 189.8 (29.3) | 180.7 (28.2) | 0.024 | 182.1 (28.1) | 182.7 (28.7) | 0.013 |
| Preoperative NYHA functional class III/IV, n(%) | 478.5 (73.9) | 480.3 (75.1) | 0.027 | 488.9 (75.3) | 484.1 (75.9) | 0.014 |
| STS score >7%, n(%) | 109.0 (16.8) | 115.7 (18.1) | 0.033 | 114.7 (17.7) | 118.3 (18.6) | 0.023 |
| Haemoglobin (g/dL), mean (SD) | 123.81 (20.86) | 123.90 (19.68) | 0.004 | 123.83 (20.13) | 123.56 (19.44) | 0.014 |
| Scr(μmol/L), median [IQR] | 75.00 [60.93, 89.34] | 77.07 [64.00, 95.00] | 0.04 | 77.00 [62.47, 91.14] | 74.35 [61.26, 94.90] | 0.001 |
| Albumin(g/L), median [IQR] | 36.60 [34.72, 38.60] | 36.50 [34.20, 38.70] | 0.023 | 36.40 [34.20, 38.50] | 36.50 [34.05, 38.60] | 0.001 |
| Emergency, n(%) | 20.7 (3.2) | 18.2 (2.8) | 0.02 | 19.5 (3.0) | 16.3 (2.6) | 0.027 |
| Valve brand, n (%) |  |  |  |  |  |  |
| Self-expanding | 541.1 (83.6) | 529.3 (82.7) | 0.023 | 541.5 (83.4) | 530.0 (83.1) | 0.008 |
| Balloon-expandable | 106.5 (16.4) | 110.6 (17.3) |  | 107.5 (16.6) | 107.6 (16.9) |  |
| Type of anaesthesia |  |  |  |  |  |  |
| GA | 229.6 (35.5) | 217.3 (34.0) | 0.031 | 222.3 (34.3) | 216.3 (33.9) | 0.007 |
| Deep sedation | 417.9 (64.5) | 422.5 (66.0) |  | 426.7 (65.7) | 421.3 (66.1) |  |
| Duration of procedure(min), median [IQR] | 99.74 [75.00, 125.00] | 100.00 [80.00, 125.00] | 0.071 | 100.00 [80.00, 125.00] | 95.00 [77.13, 120.00] | 0.039 |
| Duration of intraoperative hypotension(min), median [IQR] | 18.00 [12.00, 33.00] | 19.00 [13.00, 32.00] | 0.037 | 18.00 [12.00, 33.82] | 19.00 [13.00, 31.57] | 0.009 |
| Total fluid(mL), median [IQR] | 1500.00 [1000.00, 1500.00] | 1500.00 [1000.00, 1500.00] | 0.039 | 1500.00 [1000.00, 1500.00] | 1500.00 [1000.00, 1500.00] | 0.015 |
| Blood loss(mL), median [IQR] | 50.00 [50.00, 50.00] | 50.00 [50.00, 50.00] | 0.02 | 50.00 [50.00, 50.00] | 50.00 [34.08, 50.00] | 0.003 |
| Urine(mL), median [IQR] | 300.00 [200.00, 500.00] | 322.09 [200.00, 500.00] | 0.025 | 300.00 [200.00, 500.00] | 400.00 [200.00, 500.00] | 0.004 |
| Contrast (mL), median [IQR] | 100.00 [90.00, 120.00] | 100.00 [90.00, 120.00] | 0.064 | 100.00 [88.77, 120.00] | 100.00 [84.00, 120.00] | 0.022 |

**SD:** Standard deviation; **IQR:** Interquartile range; **IPTW:** inverse probability of treatment weighting; **MAP:** mean arterial pressure; **BMI:** body mass index; **COPD:** chronic obstructive pulmonary disease; **PCI:** percutaneous coronary intervention; **CABG:** coronary artery bypass grafting; **NYHA:** New York Heart Association; **STS:** Society of Thoracic Surgeons; **GA:** general anaesthesia; **SMD:** Standardized mean difference.

**Table S4:** Baseline characteristics before PSM

|  |  | **MAP >20% drop from baseline** | | | | **MAP >30% drop from baseline** | | | **MAP <65 mmHg** | | | **MAP <60 mmHg** | | |
| --- | --- | --- | --- | --- | --- | --- | --- | --- | --- | --- | --- | --- | --- | --- |
| **Covariate** | **Total incidence (n=643)** | **No PIH (n=238)** | **PIH (n=405)** | | **SMD** | **No PIH (n=328)** | **PIH (n=315)** | **SMD** | **No PIH (n=350)** | **PIH (n=293)** | **SMD** | **No PIH (n=433)** | **PIH (n=210)** | **SMD** |
| Age (years), mean (SD) | 74.56 (7.07) | 73.88 (7.21) | 74.96 (6.97) | | 0.152 | 73.80 (7.08) | 75.35 (6.99) | 0.221 | 73.74 (7.11) | 75.53 (6.91) | 0.255 | 73.94 (7.08) | 75.83 (6.90) | 0.27 |
| Male, n(%) | 272 (42.3) | 94 (39.5) | | 178 (44.0) | 0.09 | 133 (40.5) | 139 (44.1) | 0.072 | 142 (40.6) | 130 (44.4) | 0.077 | 186 (43.0) | 86 (41.0) | 0.041 |
| BMI(kg/m²), mean (SD) | 22.72 (3.46) | 22.82 (3.61) | 22.67 (3.37) | | 0.044 | 22.78 (3.54) | 22.67 (3.38) | 0.031 | 22.72 (3.49) | 22.73 (3.43) | 0.004 | 22.80 (3.56) | 22.57 (3.25) | 0.067 |
| Smoking , n(%) | 162 (25.2) | 58 (24.4) | 104 (25.7) | | 0.03 | 81 (24.7) | 81 (25.7) | 0.023 | 85 (24.3) | 77 (26.3) | 0.046 | 109 (25.2) | 53 (25.2) | 0.001 |
| Drinking, n (%) | 123 (19.1) | 48 (20.2) | 75 (18.5) | | 0.042 | 64 (19.5) | 59 (18.7) | 0.02 | 69 (19.7) | 54 (18.4) | 0.033 | 87 (20.1) | 36 (17.1) | 0.076 |
| Hypertension, n(%) | 361 (56.1) | 134 (56.3) | 227 (56.0) | | 0.005 | 179 (54.6) | 182 (57.8) | 0.065 | 189 (54.0) | 172 (58.7) | 0.095 | 237 (54.7) | 124 (59.0) | 0.087 |
| Diabetes, n(%) | 125 (19.4) | 48 (20.2) | 77 (19.0) | | 0.029 | 54 (16.5) | 71 (22.5) | 0.154 | 57 (16.3) | 68 (23.2) | 0.175 | 73 (16.9) | 52 (24.8) | 0.196 |
| Atrial fibrillation, n(%) | 120 (18.7) | 36 (15.1) | 84 (20.7) | | 0.147 | 52 (15.9) | 68 (21.6) | 0.147 | 57 (16.3) | 63 (21.5) | 0.134 | 69 (15.9) | 51 (24.3) | 0.209 |
| Peripheral vascular disease, n(%) | 43 (6.7) | 19 (8.0) | 24 (5.9) | | 0.081 | 24 (7.3) | 19 (6.0) | 0.052 | 24 (6.9) | 19 (6.5) | 0.015 | 26 (6.0) | 17 (8.1) | 0.082 |
| COPD, n(%) | 62 (9.6) | 21 (8.8) | 41 (10.1) | | 0.044 | 31 (9.5) | 31 (9.8) | 0.013 | 33 (9.4) | 29 (9.9) | 0.016 | 37 (8.5) | 25 (11.9) | 0.111 |
| Coronary heart disease, n(%) | 214 (33.3) | 82 (34.5) | 132 (32.6) | | 0.039 | 103 (31.4) | 111 (35.2) | 0.081 | 112 (32.0) | 102 (34.8) | 0.06 | 132 (30.5) | 82 (39.0) | 0.181 |
| Preoperative pulmonary infection, n(%) | 26 (4.0) | 11 (4.6) | 15 (3.7) | | 0.046 | 13 (4.0) | 13 (4.1) | 0.008 | 14 (4.0) | 12 (4.1) | 0.005 | 19 (4.4) | 7 (3.3) | 0.055 |
| Previous myocardial infarction, n(%) | 2 (0.3) | 1 (0.4) | 1 (0.2) | | 0.03 | 13 (4.0) | 13 (4.1) | 0.008 | 1 (0.3) | 1 (0.3) | 0.01 | 1 (0.2) | 1 (0.5) | 0.041 |
| Previous stroke, n(%) | 38 (5.9) | 13 (5.5) | 25 (6.2) | | 0.03 | 20 (6.1) | 18 (5.7) | 0.016 | 20 (5.7) | 18 (6.1) | 0.018 | 22 (5.1) | 16 (7.6) | 0.104 |
| History of PCI/CABG , n(%) | 63 (9.8) | 21 (8.8) | 42 (10.4) | | 0.053 | 26 (7.9) | 37 (11.7) | 0.129 | 27 (7.7) | 36 (12.3) | 0.153 | 35 (8.1) | 28 (13.3) | 0.17 |
| Preoperative ejection fraction <35%, n(%) | 44 (6.8) | 16 (6.7) | 28 (6.9) | | 0.008 | 19 (5.8) | 25 (7.9) | 0.085 | 22 (6.3) | 22 (7.5) | 0.048 | 27 (6.2) | 17 (8.1) | 0.072 |
| Preoperative maximum gradient(mmHg), median [IQR] | 80.00 [64.00, 104.00] | 85.50 [66.25, 108.00] | 78.00 [62.00, 102.00] | | 0.089 | 80.00 [65.00, 104.00] | 80.00 [62.00, 102.50] | 0.006 | 80.00 [65.00, 104.75] | 80.00 [62.00, 102.00] | 0.004 | 82.00 [65.00, 105.00] | 76.00 [60.00, 100.11] | 0.034 |
| Preoperative maximum velocity(m/s), median [IQR] | 4.46 [4.00, 5.11] | 4.64 [4.07, 5.22] | 4.40 [3.95, 5.04] | | 0.109 | 4.50 [4.03, 5.19] | 4.41 [3.92, 5.06] | 0.051 | 4.50 [4.03, 5.19] | 4.41 [3.91, 5.04] | 0.049 | 4.52 [4.05, 5.19] | 4.35 [3.88, 4.99] | 0.048 |
| Preoperative aortic valve area (cm²), median [IQR] | 0.70 [0.52, 0.88] | 0.67 [0.53, 0.88] | 0.72 [0.51, 0.88] | | 0.079 | 0.70 [0.54, 0.89] | 0.71 [0.50, 0.88] | 0.14 | 0.70 [0.53, 0.90] | 0.71 [0.50, 0.88] | 0.111 | 0.69 [0.53, 0.88] | 0.72 [0.50, 0.88] | 0.021 |
| Aortic regurgitation(moderate/severe), n(%) | 355 (55.2) | 132 (55.5) | 223 (55.1) | | 0.008 | 182 (55.5) | 173 (54.9) | 0.011 | 196 (56.0) | 159 (54.3) | 0.035 | 240 (55.4) | 115 (54.8) | 0.013 |
| Mitral regurgitation(moderate/severe), n(%) | 191 (29.7) | 68 (28.6) | 123 (30.4) | | 0.039 | 92 (28.0) | 99 (31.4) | 0.074 | 103 (29.4) | 88 (30.0) | 0.013 | 118 (27.3) | 73 (34.8) | 0.163 |
| β adrenergic receptor blocker, n(%) | 119 (18.5) | 34 (14.3) | 85 (21.0) | | 0.177 | 47 (14.3) | 72 (22.9) | 0.221 | 51 (14.6) | 68 (23.2) | 0.222 | 72 (16.6) | 47 (22.4) | 0.146 |
| Aspirin, n(%) | 163 (25.3) | 62 (26.1) | 101 (24.9) | | 0.026 | 89 (27.1) | 74 (23.5) | 0.084 | 93 (26.6) | 70 (23.9) | 0.062 | 113 (26.1) | 50 (23.8) | 0.053 |
| ACEI/ARBs, n(%) | 184 (28.6) | 61 (25.6) | 123 (30.4) | | 0.106 | 85 (25.9) | 99 (31.4) | 0.122 | 92 (26.3) | 92 (31.4) | 0.113 | 116 (26.8) | 68 (32.4) | 0.123 |
| Preoperative NYHA functional class III/IV, n(%) | 480 (74.7) | 169 (71.0) | 311 (76.8) | | 0.132 | 231 (70.4) | 249 (79.0) | 0.199 | 247 (70.6) | 233 (79.5) | 0.208 | 27 (6.2) | 17 (8.1) | 0.072 |
| STS score >7%, n(%) | 114 (17.7) | 40 (16.8) | 74 (18.3) | | 0.039 | 49 (14.9) | 65 (20.6) | 0.149 | 51 (14.6) | 63 (21.5) | 0.181 | 65 (15.0) | 49 (23.3) | 0.213 |
| Haemoglobin (g/dL), mean (SD) | 124.11 (20.19) | 126.73 (20.49) | 122.56 (19.88) | | 0.206 | 126.25 (19.67) | 121.87 (20.51) | 0.218 | 125.90 (19.72) | 121.97 (20.57) | 0.195 | 125.12 (19.31) | 122.02 (21.80) | 0.15 |
| Scr(μmol/L), median [IQR] | 76.10 [62.00, 94.35] | 75.00 [61.00, 90.75] | 77.10 [63.10, 96.00] | | 0.061 | 76.90 [62.00, 90.25] | 75.90 [61.90, 97.75] | 0.11 | 76.00 [62.00, 90.00] | 77.00 [62.60, 98.50] | 0.134 | 75.00 [62.00, 90.00] | 78.55 [62.62, 101.75] | 0.077 |
| Albumin(g/L), median [IQR] | 36.50 [34.20, 38.60] | 36.70 [34.82, 39.00] | 36.20 [34.00, 38.40] | | 0.162 | 36.70 [34.68, 38.90] | 36.00 [33.55, 38.40] | 0.223 | 36.70 [34.60, 38.90] | 36.00 [33.60, 38.30] | 0.214 | 36.60 [34.30, 38.80] | 36.10 [33.73, 38.10] | 0.135 |
| Emergency, n(%) | 21 (3.3) | 12 (5.0) | 9 (2.2) | | 0.151 | 13 (4.0) | 8 (2.5) | 0.08 | 13 (3.7) | 8 (2.7) | 0.056 | 14 (3.2) | 7 (3.3) | 0.006 |
| Valve brand, n (%) |  |  |  | |  |  |  |  |  |  |  |  |  |  |
| Self-expanding | 533 (82.9) | 204 (85.7) | 329 (81.2) | | 0.121 | 282 (86.0) | 251 (79.7) | 0.167 | 299 (85.4) | 234 (79.9) | 0.147 | 371 (85.7) | 162 (77.1) | 0.221 |
| Balloon-expandable | 110 (17.1) | 34 (14.3) | 76 (18.8) | |  | 46 (14.0) | 64 (20.3) |  | 51 (14.6) | 59 (20.1) |  | 62 (14.3) | 48 (22.9) |  |
| Type of anaesthesia |  |  |  | |  |  |  |  |  |  |  |  |  |  |
| GA | 214 (33.3) | 58 (24.4) | 156 (38.5) | | 0.308 | 93 (28.4) | 121 (38.4) | 0.215 | 95 (27.1) | 119 (40.6) | 0.288 | 102 (23.6) | 112 (53.3) | 0.643 |
| Deep sedation | 429 (66.7) | 180 (75.6) | 249 (61.5) | |  | 235 (71.6) | 194 (61.6) |  | 255 (72.9) | 174 (59.4) |  | 331 (76.4) | 98 (46.7) |  |
| Duration of procedure(min), median [IQR] | 100.00 [80.00, 125.00] | 100.00 [80.00, 125.00] | 100.00 [80.00, 125.00] | | 0.07 | 100.00 [80.00, 125.00] | 100.00 [80.00, 122.50] | 0.01 | 100.00 [80.00, 125.00] | 95.00 [80.00, 120.00] | 0.035 | 100.00 [80.00, 125.00] | 95.00 [76.25, 120.00] | 0.083 |
| Duration of intraoperative hypotension(min), median [IQR] | - | 16.00 [10.00, 27.00] | 20.00 [13.00, 34.00] | | 0.295 | 17.00 [11.00, 29.00] | 21.00 [13.00, 34.50] | 0.27 | 17.00 [11.00, 30.00] | 21.00 [14.00, 34.00] | 0.234 | 17.00 [11.00, 30.00] | 21.50 [15.00, 33.75] | 0.209 |
| Total fluid(mL), median [IQR] | 1500.00 [1000.00, 1500.00] | 1500.00 [1000.00, 1500.00] | 1500.00 [1000.00, 1500.00] | | 0.109 | 1500.00 [1000.00, 1500.00] | 1500.00 [1000.00, 1500.00] | 0.068 | 1500.00 [1000.00, 1500.00] | 1500.00 [1000.00, 1500.00] | 0.07 | 1500.00 [1000.00, 1500.00] | 1500.00 [1000.00, 1500.00] | 0.054 |
| Blood loss(mL), median [IQR] | 50.00 [50.00, 50.00] | 50.00 [50.00, 50.00] | 50.00 [50.00, 50.00] | | 0.042 | 50.00 [50.00, 50.00] | 50.00 [50.00, 50.00] | 0.008 | 50.00 [50.00, 50.00] | 50.00 [50.00, 50.00] | 0.021 | 50.00 [50.00, 50.00] | 50.00 [50.00, 50.00] | 0.082 |
| Urine(mL), median [IQR] | 300.00 [200.00, 500.00] | 300.00 [200.00, 500.00] | 400.00 [200.00, 500.00] | | 0.054 | 300.00 [200.00, 500.00] | 400.00 [200.00, 500.00] | 0.015 | 300.00 [200.00, 500.00] | 400.00 [200.00, 500.00] | 0.01 | 300.00 [200.00, 500.00] | 400.00 [200.00, 500.00] | 0.05 |
| Contrast (mL), median [IQR] | 100.00 [90.00, 120.00] | 100.00 [90.00, 120.00] | 100.00 [90.00, 120.00] | | 0.015 | 100.00 [90.00, 120.00] | 100.00 [84.50, 120.00] | 0.019 | 100.00 [90.00, 120.00] | 100.00 [90.00, 120.00] | 0.011 | 100.00 [90.00, 120.00] | 100.00 [90.00, 120.00] | 0.073 |

**SD:** Standard deviation; **IQR:** Interquartile range; **PSM**: Propensity score matching; **PIH:** Postinduction hypotension; **BMI:** Body mass index; **COPD:** Chronic obstructive pulmonary disease; **PCI:** Percutaneous coronary intervention; **CABG:** Coronary artery bypass grafting; **NYHA:** New York Heart Association; **STS:** Society of Thoracic Surgeons; **GA:** General anaesthesia; **SMD:** Standardized mean difference.

**Table S5:** Baseline characteristics after PSM

|  | **MAP >20% drop from baseline** | | | **MAP >30% drop from baseline** | | | **MAP <65 mmHg** | | | **MAP <60 mmHg** | | |
| --- | --- | --- | --- | --- | --- | --- | --- | --- | --- | --- | --- | --- |
| **Covariate** | **No PIH (n=209)** | **PIH (n=209)** | **SMD** | **No PIH (n=240)** | **PIH (n=240)** | **SMD** | **No PIH (n=242)** | **PIH (n=242)** | **SMD** | **No PIH (n=181)** | **PIH (n=181)** | **SMD** |
| Age (years), mean (SD) | 74.25 (7.18) | 74.72 (7.31) | 0.064 | 74.75 (7.15) | 74.80 (7.08) | 0.007 | 74.79 (7.27) | 75.05 (6.97) | 0.036 | 74.82 (7.10) | 75.43 (6.75) | 0.088 |
| Male, n(%) | 84 (40.2) | 89 (42.6) | 0.049 | 107 (44.6) | 104 (43.3) | 0.025 | 113 (46.7) | 105 (43.4) | 0.066 | 77 (42.5) | 76 (42.0) | 0.011 |
| BMI(kg/m²), mean (SD) | 22.79 (3.63) | 22.65 (3.30) | 0.039 | 22.77 (3.54) | 22.63 (3.35) | 0.042 | 22.76 (3.57) | 22.73 (3.44) | 0.008 | 22.32 (3.11) | 22.70 (3.12) | 0.12 |
| Smoking , n(%) | 51 (24.4) | 52 (24.9) | 0.011 | 60 (25.0) | 60 (25.0) | <0.001 | 54 (22.3) | 60 (24.8) | 0.058 | 44 (24.3) | 48 (26.5) | 0.051 |
| Drinking, n (%) | 40 (19.1) | 41 (19.6) | 0.012 | 47 (19.6) | 47 (19.6) | <0.001 | 45 (18.6) | 45 (18.6) | <0.001 | 33 (18.2) | 32 (17.7) | 0.014 |
| Hypertension, n(%) | 118 (56.5) | 111 (53.1) | 0.067 | 133 (55.4) | 134 (55.8) | 0.008 | 135 (55.8) | 138 (57.0) | 0.025 | 103 (56.9) | 108 (59.7) | 0.056 |
| Diabetes, n(%) | 39 (18.7) | 44 (21.1) | 0.06 | 42 (17.5) | 45 (18.8) | 0.032 | 43 (17.8) | 55 (22.7) | 0.124 | 51 (28.2) | 44 (24.3) | 0.088 |
| Atrial fibrillation, n(%) | 34 (16.3) | 48 (23.0) | 0.169 | 43 (17.9) | 46 (19.2) | 0.032 | 48 (19.8) | 43 (17.8) | 0.053 | 34 (18.8) | 40 (22.1) | 0.082 |
| Peripheral vascular disease, n(%) | 16 (7.7) | 12 (5.7) | 0.077 | 18 (7.5) | 17 (7.1) | 0.016 | 14 (5.8) | 18 (7.4) | 0.067 | 13 (7.2) | 13 (7.2) | <0.001 |
| COPD, n(%) | 19 (9.1) | 19 (9.1) | <0.001 | 23 (9.6) | 23 (9.6) | <0.001 | 24 (9.9) | 23 (9.5) | 0.014 | 18 (9.9) | 22 (12.2) | 0.071 |
| Coronary heart disease, n(%) | 70 (33.5) | 66 (31.6) | 0.041 | 77 (32.1) | 78 (32.5) | 0.009 | 74 (30.6) | 82 (33.9) | 0.071 | 66 (36.5) | 67 (37.0) | 0.011 |
| Preoperative pulmonary infection, n(%) | 9 (4.3) | 6 (2.9) | 0.077 | 7 (2.9) | 8 (3.3) | 0.024 | 8 (3.3) | 10 (4.1) | 0.044 | 9 (5.0) | 7 (3.9) | 0.054 |
| Previous myocardial infarction, n(%) | 1 (0.5) | 0 (0.0) | 0.098 | 1 (0.4) | 0 (0.0) | 0.091 | 0 (0.0) | 1 (0.4) | 0.091 | 1 (0.6) | 1 (0.6) | <0.001 |
| Previous stroke, n(%) | 11 (5.3) | 11 (5.3) | <0.001 | 13 (5.4) | 14 (5.8) | 0.018 | 11 (4.5) | 11 (4.5) | <0.001 | 10 (5.5) | 12 (6.6) | 0.046 |
| History of PCI/CABG , n(%) | 20 9.6) | 20 (9.6) | <0.001 | 22 (9.2) | 19 (7.9) | 0.045 | 22 (9.1) | 30 (12.4) | 0.107 | 24 (13.3) | 23 (12.7) | 0.016 |
| Preoperative ejection fraction <35%, n(%) | 12 (5.7) | 10 (4.8) | 0.043 | 15 (6.2) | 17 (7.1) | 0.033 | 16 (6.6) | 17 (7.0) | 0.016 | 17 (9.4) | 14 (7.7) | 0.059 |
| Preoperative maximum gradient(mmHg), median [IQR] | 84.00 [66.00, 105.00] | 82.00 [65.00, 105.00] | 0.029 | 79.00 [65.00, 101.00] | 78.00 [61.75, 102.00] | 0.03 | 78.00 [64.00, 104.75] | 80.00 [62.00, 104.50] | 0.046 | 80.00 [64.00, 102.00] | 77.00 [60.00, 102.00] | 0.021 |
| Preoperative maximum velocity(m/s), median [IQR] | 4.59 [4.05, 5.19] | 4.52 [4.03, 5.18] | 0.09 | 4.46 [4.07, 5.07] | 4.40 [3.89, 5.04] | 0.041 | 4.44 [4.03, 5.19] | 4.40 [3.91, 5.10] | 0.036 | 4.44 [4.01, 5.04] | 4.37 [3.81, 5.03] | 0.039 |
| Preoperative aortic valve area (cm²), median [IQR] | 0.68 [0.53, 0.88] | 0.71 [0.50, 0.87] | 0.066 | 0.69 [0.54, 0.88] | 0.71 [0.50, 0.89] | 0.025 | 0.69 [0.53, 0.90] | 0.71 [0.50, 0.88] | 0.036 | 0.69 [0.53, 0.89] | 0.72 [0.50, 0.88] | 0.019 |
| Aortic regurgitation(moderate/severe), n(%) | 114 (54.5) | 114 (54.5) | <0.001 | 129 (53.8) | 131 (54.6) | 0.017 | 136 (56.2) | 133 (55.0) | 0.025 | 97 (53.6) | 101 (55.8) | 0.044 |
| Mitral regurgitation(moderate/severe), n(%) moderate/severe | 57 (27.3) | 64 (30.6) | 0.074 | 69 (28.7) | 74 (30.8) | 0.046 | 74 (30.6) | 75 (31.0) | 0.009 | 54 (29.8) | 59 (32.6) | 0.06 |
| β adrenergic receptor blocker, n(%) | 32 (15.3) | 38 (18.2) | 0.077 | 41 (17.1) | 46 (19.2) | 0.054 | 46 (19.0) | 50 (20.7) | 0.041 | 37 (20.4) | 38 (21.0) | 0.014 |
| Aspirin, n(%) | 56 (26.8) | 49 (23.4) | 0.077 | 56 (23.3) | 59 (24.6) | 0.029 | 61 (25.2) | 61 (25.2) | <0.001 | 47 (26.0) | 44 (24.3) | 0.038 |
| ACEI/ARBs, n(%) | 57 (27.3) | 58 (27.8) | 0.011 | 66 (27.5) | 68 (28.3) | 0.019 | 71 (29.3) | 70 (28.9) | 0.009 | 56 (30.9) | 58 (32.0) | 0.024 |
| Preoperative NYHA functional class III/IV, n(%) | 148 (70.8) | 156 (74.6) | 0.086 | 181 (75.4) | 187 (77.9) | 0.059 | 187 (77.3) | 185 (76.4) | 0.02 | 145 (80.1) | 138 (76.2) | 0.094 |
| STS score >7%, n(%) | 35 (16.7) | 36 (17.2) | 0.013 | 43 (17.9) | 46 (19.2) | 0.032 | 41 (16.9) | 48 (19.8) | 0.075 | 36 (19.9) | 35 (19.3) | 0.014 |
| Haemoglobin (g/dL), mean (SD) | 125.85 (20.76) | 124.48 (18.90) | 0.069 | 123.86 (19.44) | 124.08 (19.76) | 0.011 | 124.26 (19.67) | 123.63 (20.28) | 0.032 | 121.31 (19.63) | 122.88 (21.22) | 0.077 |
| Scr(μmol/L), median [IQR] | 75.00 [60.40, 90.00] | 75.00 [62.70, 89.50] | 0.077 | 77.50 [63.08, 91.85] | 75.00 [61.55, 94.93] | 0.03 | 76.45 [62.00, 90.00] | 75.00 [61.65, 95.88] | 0.047 | 78.60 [63.10, 95.00] | 75.90 [61.80, 98.00] | 0.05 |
| Albumin(g/L), median [IQR] | 36.50 [34.50, 38.40] | 36.60 [34.30, 38.80] | 0.056 | 36.45 [34.20, 38.32] | 36.40 [34.20, 38.42] | 0.046 | 36.15 [34.20, 38.40] | 36.40 [34.12, 38.50] | 0.025 | 36.00 [34.10, 38.50] | 36.10 [33.80, 38.10] | 0.033 |
| Emergency, n(%) | 7 (3.3) | 7 (3.3) | <0.001 | 7 (2.9) | 7 (2.9) | <0.001 | 5 (2.1) | 7 (2.9) | 0.053 | 7 (3.9) | 5 (2.8) | 0.062 |
| Valve brand, n (%) |  |  |  |  |  |  |  |  |  |  |  |  |
| Self-expanding | 179 (85.6) | 182 (87.1) | 0.042 | 200 (83.3) | 195 (81.2) | 0.055 | 197 (81.4) | 196 (81.0) | 0.011 | 135 (74.6) | 144 (79.6) | 0.118 |
| Balloon-expandable | 30 (14.4) | 27 (12.9) |  | 40 (16.7) | 45 (18.8) |  | 45 (18.6) | 46 (19.0) |  | 46 (25.4) | 37 (20.4) |  |
| Type of anaesthesia |  |  |  |  |  |  |  |  |  |  |  |  |
| GA | 57 (27.3) | 64 (30.6) | 0.074 | 82 (34.2) | 87 (36.2) | 0.044 | 84 (34.7) | 90 (37.2) | 0.052 | 84 (46.4) | 85 (47.0) | 0.011 |
| Deep sedation | 152 (72.7) | 145 (69.4) |  | 158 (65.8) | 153 (63.7) |  | 158 (65.3) | 152 (62.8) |  | 97 (53.6) | 96 (53.0) |  |
| Duration of procedure(min), median [IQR] | 100.00 [80.00, 125.00] | 95.00 [80.00, 120.00] | 0.021 | 100.00 [80.00, 125.00] | 100.00 [80.00, 121.25] | 0.003 | 100.00 [80.00, 125.00] | 95.00 [80.00, 120.00] | 0.048 | 95.00 [80.00, 125.00] | 100.00 [80.00, 120.00] | 0.029 |
| Duration of intraoperative hypotension(min), median [IQR] | 17.00 [11.00, 28.00] | 18.00 [12.00, 28.00] | 0.021 | 19.00 [12.00, 34.00] | 19.00 [13.00, 32.00] | 0.036 | 18.00 [13.00, 33.00] | 20.00 [14.00, 34.00] | 0.058 | 22.00 [13.00, 37.00] | 21.00 [14.00, 32.00] | 0.056 |
| Total fluid(mL), median [IQR] | 1500.00 [1000.00, 1500.00] | 1500.00 [1000.00, 1500.00] | 0.071 | 1500.00 [1000.00, 1500.00] | 1500.00 [1000.00, 1500.00] | 0.039 | 1500.00 [1000.00, 1500.00] | 1500.00 [1000.00, 1500.00] | 0.012 | 1500.00 [1000.00, 1500.00] | 1500.00 [1000.00, 1500.00] | 0.043 |
| Blood loss(mL), median [IQR] | 50.00 [50.00, 50.00] | 50.00 [25.00, 50.00] | 0.036 | 50.00 [50.00, 50.00] | 50.00 [50.00, 50.00] | 0.009 | 50.00 [50.00, 50.00] | 50.00 [30.00, 50.00] | 0.016 | 50.00 [50.00, 50.00] | 50.00 [30.00, 50.00] | 0.092 |
| Urine(mL), median [IQR] | 300.00 [200.00, 500.00] | 300.00 [200.00, 500.00] | 0.083 | 300.00 [200.00, 500.00] | 310.00 [200.00, 500.00] | 0.084 | 300.00 [200.00, 500.00] | 375.00 [200.00, 500.00] | 0.013 | 300.00 [200.00, 500.00] | 320.00 [200.00, 500.00] | 0.019 |
| Contrast (mL), median [IQR] | 100.00 [90.00, 120.00] | 100.00 [85.00, 120.00] | 0.024 | 100.00 [90.00, 120.00] | 100.00 [90.00, 120.00] | 0.035 | 100.00 [90.00, 120.00] | 100.00 [89.25, 120.00] | 0.046 | 100.00 [88.00, 120.00] | 100.00 [90.00, 120.00] | 0.087 |

**SD:** Standard deviation; **IQR:** Interquartile range; **PSM**: Propensity score matching; **PIH:** Postinduction hypotension; **BMI:** Body mass index; **COPD:** Chronic obstructive pulmonary disease; **PCI:** Percutaneous coronary intervention; **CABG:** Coronary artery bypass grafting; **NYHA:** New York Heart Association; **STS:** Society of Thoracic Surgeons; **GA:** General anaesthesia; **SMD:** Standardized mean difference.

**Table S6:** Associations between PIH and composite outcome components in the crude and propensity score analyses

| **Components of composite outcome** | **Analysis** | | **MAP >20% drop from baseline** | | **MAP >30% drop from baseline** | | **<65 mmHg** | | | **<60 mmHg** | |
| --- | --- | --- | --- | --- | --- | --- | --- | --- | --- | --- | --- |
| **Relative Risk(95%CI)** | ***P* Value** | **Relative Risk(95%CI)** | ***P* Value** | **Relative Risk(95%CI)** | | ***P* Value** | **Relative Risk(95%CI)** | ***P* Value** |
| Mortality | No. of events/no. of patients at risk (%) | |  |  |  |  |  |  | |  |  |
|  | PIH, n(%) | | 1/405 (0.2) | *—* | 1/315 (0.3) | *—* | 1/293 (0.3) | *—* | | 1/210 (0.5) | *—* |
|  | No PIH, n(%) | 2/238 (0.8) | | *—* | 2/328 (0.6) | *—* | 2/350 (0.6) | *—* | | 2/433 (0.5) | *—* |
|  | Crude analysis | | 0.29 (0.01-3.06) | 0.316 | 0.519 (0.014-5.45) | 0.593 | 0.60 (0.028-6.25) | 0.673 | | 1.03 (0.048-10.82) | 0.98 |
|  | Propensity-score analyses | |  |  |  |  |  |  | |  |  |
|  | Inverse probability of treatment weighting | | 0.25 (0.03-1.19) | 0.124 | 0.61 (0.09-3.14) | 0.558 | 0.71 (0.11-3.83) | 0.687 | | 1.59 (0.33-9.16) | 0.565 |
|  | With matching | | NA | 0.996 | 1.00 (0.039-25.39) | 1 | 1 (0.04-25.39) | 1 | | 1 (0.04-25.42) | 1 |
|  | With propensity score regression | | 0.22 (0.01-2.64) | 0.243 | 0.49 (0.02-5.83) | 0.581 | 0.59 (0.025-7.06) | 0.682 | | 2.00 (0.08-23.79) | 0.593 |
| Stroke | No. of events/no. of patients at risk (%) | |  |  |  |  |  |  | |  |  |
|  | PIH, n(%) | | 12/405 (3.0) | *—* | 12/315 (3.8) | *—* | 11/293 (3.8) | *—* | | 10/210 (4.8) | *—* |
|  | No PIH, n(%) | | 1/238 (0.4) | *—* | 1/328 (0.3) | *—* | 2/350 (0.6) | *—* | | 3/433 (0.7) | *—* |
|  | Crude analysis | | 7.24 (1.41-132.26) | 0.058 | 12.95 (2.53-236.65) | 0.014 | 6.78 (1.80-44.10) | 0.013 | | 7.17 (2.16-32.22) | 0.003 |
|  | Propensity-score analyses | |  |  |  |  |  |  | |  |  |
|  | Inverse probability of treatment weighting | | 7.25 (2.87-96.66) | 0.004 | 7.36 (2.72-27.40) | <0.001 | 5.32 (2.08-17.19) | 0.001 | | 5.22 (1.98-17.75) | 0.002 |
|  | With matching | | NA | 0.993 | 9.31 (1.73-172.40) | 0.035 | 4.64 (1.18-30.61) | 0.051 | | 9.42 (1.74-174.61) | 0.034 |
|  | With propensity score regression | | 6.05 (1.11-113.09) | 0.09 | 10.94 (1.39-166.02) | 0.024 | 5.66 (1.41-38.02) | 0.03 | | 4.89 (1.33-23.48) | 0.025 |
| AKI | No. of events/no. of patients at risk (%) | |  |  |  |  |  |  | |  |  |
|  | PIH, n(%) | | 33/405 (8.1) |  | 27/315 (8.6) | *—* | 26/293 (8.9) | *—* | | 26/210 (12.4) | *—* |
|  | No PIH, n(%) | | 7/238 (0.4) |  | 13/328 (4.0) | *—* | 14/350 (4.0) | *—* | | 14/433 (3.2) | *—* |
|  | Crude analysis | | 2.93 (1.35-7.31) | 0.011 | 2.27 (1.17-4.63) | 0.018 | 2.33 (1.21-4.68) | 0.013 | | 4.23 (2.19-8.50) | <0.001 |
|  | Propensity-score analyses | |  |  |  |  |  |  | |  |  |
|  | Inverse probability of treatment weighting | | 2.63 (1.57-4.56) | <0.001 | 1.79 (1.10-2.98) | 0.021 | 1.67 (1.03-2.75) | 0.04 | | 2.82 (1.73-4.79) | <0.001 |
|  | With matching | | 2.39 (1.00-6.34) | 0.06 | 1.63 (0.78-3.53) | 0.197 | 1.79 (0.85-3.97) | 0.136 | | 4.45 (1.89-12.29) | 0.001 |
|  | With propensity score regression | | 2.41 (1.07-6.19) | 0.046 | 1.59 (0.79-3.35) | 0.203 | 1.52 (0.755-3.16) | 0.248 | | 3.27 (1.60-6.92) | 0.001 |
| MI | No. of events/no. of patients at risk (%) | |  |  |  |  |  |  | |  |  |
|  | PIH, n(%) | | 7/405 (1.7) |  | 5/315 (1.6) | — | 5/293 (1.7) | *—* | | 5/210 (2.4) | *—* |
|  | No PIH, n(%) | | 3/238 (1.3) |  | 5/328 (1.5) | — | 5/350 (1.4) | *—* | | 5/433 (1.2) | *—* |
|  | Crude analysis | | 1.38 (0.38-6.44) | 0.345 | 1.04 (0.29-3.78) | 0.949 | 1.19 (0.33-4.35) | 0.777 | | 2.09 (0.57-7.58) | 0.249 |
|  | Propensity-score analyses | |  |  |  |  |  |  | |  |  |
|  | Inverse probability of treatment weighting | | 1.10 (0.46-2.62) | 0.829 | 0.72 (0.30-1.67) | 0.444 | 0.75 (0.31-1.73) | 0.5 | | 1.49 (0.63-3.69) | 0.37 |
|  | With matching | | 1.68 (0.41-8.29) | 0.48 | 1.34 (0.29-6.86) | 0.704 | 2.53 (0.54-17.80) | 0.27 | | 2.02 (0.39-14.72) | 0.419 |
|  | With propensity score regression | | 1.32 (0.34-6.61) | 0.702 | 0.86 (0.22-3.33) | 0.817 | 1.01 (0.26-3.95) | 0.988 | | 1.60 (0.39-6.49) | 0.504 |

**PIH:** Postinduction hypotension; **MAP:** Mean arterial pressure; **AKI**: Acute kidney injury; **MI**: Myocardial infarction.

**Table S7:** Associations between PIH duration and composite outcome for MAP >20% from baseline and <65 mmHg

|  | | | | | | | | |
| --- | --- | --- | --- | --- | --- | --- | --- | --- |
| **Duration of PIH** | **MAP >20% drop from baseline** | | | | **<65 mmHg** | | | |
|  | No Composite outcome(n=582) | Composite outcome (n=61) | OR (Multivariable) | *P* Value | No Composite outcome(n=582) | Composite outcome(n=61) | OR (Multivariable) | *P* Value |
| No hypotension, n(%) | 225 (38.7) | 13 (21.3) | Reference | Reference | 327 (56.2) | 23 (37.7) | Reference | Reference |
| Short (<10 min) duration of hypotension, n(%) | 258 (44.3) | 19 (31.1) | 1.32 (0.63-2.78) | 0.467 | 167 (28.7) | 14 (23) | 1.04 (0.51-2.14) | 0.908 |
| Prolonged (≥10 min) duration of hypotension, n(%) | 99(17) | 29 (47.5) | 4.09 (1.92-8.73) | <0.001 | 88 (15.1) | 24 (39.3) | 2.67 (1.36-5.2) | 0.004 |

**PIH:** Postinduction hypotension; **MAP:** Mean arterial pressure; **OR:** Odds Ratio.

**Table S8:** Multivariable regression analysis of risk factors for composite outcome in patients with a decrease in MAP >20% from baseline

| **Covariate** | **No Composite Outcome (N=582)** | **Composite Outcome (N=61)** | **OR (univariable)** | ***P* Value** | **OR (multivariable)** | | ***P* Value** |
| --- | --- | --- | --- | --- | --- | --- | --- |
| Age (years), mean (SD) |  |  |  |  |  |  | |
| ≤85 | 551 (94.7) | 50 (82) |  |  |  |  | |
| >85 | 31 (5.3) | 11 (18) | 3.91 (1.85-8.25) | <0.001 | 2.45 (1.06-5.66) | 0.037 | |
| Duration of hypotension(min), n(%) |  |  |  |  |  |  | |
| No hypotension | 225 (38.7) | 13 (21.3) |  |  |  |  | |
| Short (<10 min) duration of hypotension | 258 (44.3) | 19 (31.1) | 1.27 (0.62-2.64) | 0.513 | 1.32 (0.63-2.78) | 0.467 | |
| Prolonged (≥10 min) duration of hypotension | 99 (17) | 29 (47.5) | 5.07 (2.53-10.16) | <0.001 | 4.09 (1.92-8.73) | <0.001 | |
| Diabetes, n(%) |  |  |  |  |  |  | |
| No | 478 (82.1) | 40 (65.6) |  |  |  |  | |
| Yes | 104 (17.9) | 21 (34.4) | 2.41 (1.37-4.26) | 0.002 | 2.16 (1.17-4.00) | 0.014 | |
| STS score, n(%) |  |  |  |  |  |  | |
| ≤7% | 494 (84.9) | 35 (57.4) |  |  |  |  | |
| >7% | 88 (15.1) | 26 (42.6) | 4.17 (2.39-7.27) | <0.001 | 2.72 (1.45-5.10) | 0.002 | |
| Previous stroke, n(%) |  |  |  |  |  |  | |
| No | 549 (94.3) | 56 (91.8) |  |  |  |  | |
| Yes | 33 (5.7) | 5 (8.2) | 1.49 (0.56-3.96) | 0.429 |  |  | |
| Albumin, n(%) |  |  |  |  |  |  | |
| ≥33 | 503 (86.4) | 45 (73.8) |  |  |  |  | |
| <33 | 79 (13.6) | 16 (26.2) | 2.26 (1.22-4.20) | 0.009 | 1.66 (0.84-3.31) | 0.147 | |
| Type of anaesthesia, n(%) |  |  |  |  |  |  | |
| General anaesthesia | 183 (31.4) | 31 (50.8) |  |  |  |  | |
| Deep sedation | 399 (68.6) | 30 (49.2) | 0.44 (0.26-0.76) | 0.003 | 0.79 (0.43-1.45) | 0.443 | |

**MAP:** mean arterial pressure; **STS**: Society of Thoracic Surgeons; **OR:** Odds Ratio.

**Table S9:** Multivariable regression analysis of risk factors for composite outcomes in patients whose MAP decreased >30% from baseline

| **Covariate** | **No Composite Outcome (N=582)** | **Composite Outcome (N=61)** | **OR (univariable)** | ***P* Value** | **OR (multivariable)** | | ***P* Value** |
| --- | --- | --- | --- | --- | --- | --- | --- |
| Age (years), mean (SD) |  |  |  |  |  |  | |
| ≤85 | 551 (94.7) | 50 (82) |  |  |  |  | |
| >85 | 31 (5.3) | 11 (18) | 3.91 (1.85-8.25) | <0.001 | 2.43 (1.05-5.63) | 0.039 | |
| Duration of hypotension(min), n(%) |  |  |  |  |  |  | |
| No hypotension | 307 (52.7) | 21 (34.4) |  |  |  |  | |
| Short (<10 min) duration of hypotension | 198 (34) | 12 (19.7) | 0.89 (0.43-1.84) | 0.746 | 0.81 (0.38-1.71) | 0.575 | |
| Prolonged (≥10 min) duration of hypotension | 77 (13.2) | 28 (45.9) | 5.32 (2.86-9.87) | <0.001 | 3.75 (1.92-7.35) | <0.001 | |
| Diabetes, n(%) |  |  |  |  |  |  | |
| No | 478 (82.1) | 40 (65.6) |  |  |  |  | |
| Yes | 104 (17.9) | 21 (34.4) | 2.41 (1.37-4.26) | 0.002 | 2.07 (1.11-3.84) | 0.022 | |
| STS score, n(%) |  |  |  |  |  |  | |
| ≤7% | 494 (84.9) | 35 (57.4) |  |  |  |  | |
| >7% | 88 (15.1) | 26 (42.6) | 4.17 (2.39-7.27) | <0.001 | 2.60 (1.38-4.88) | 0.003 | |
| Previous stroke, n(%) |  |  |  |  |  |  | |
| No | 549 (94.3) | 56 (91.8) |  |  |  |  | |
| Yes | 33 (5.7) | 5 (8.2) | 1.49 (0.56-3.96) | 0.429 |  |  | |
| Albumin, n(%) |  |  |  |  |  |  | |
| ≥33 | 503 (86.4) | 45 (73.8) |  |  |  |  | |
| <33 | 79 (13.6) | 16 (26.2) | 2.26 (1.22-4.20) | 0.009 | 1.64 (0.82-3.30) | 0.162 | |
| Type of anaesthesia, n(%) |  |  |  |  |  |  | |
| General anaesthesia | 183 (31.4) | 31 (50.8) |  |  |  |  | |
| Deep sedation | 399 (68.6) | 30 (49.2) | 0.44 (0.26-0.76) | 0.003 | 0.74 (0.41-1.33) | 0.313 | |

**MAP:** mean arterial pressure; **STS**: Society of Thoracic Surgeons; **OR:** Odds Ratio.

**Table S10:** Multivariable regression analysis of risk factors for composite outcome in MAP <65 mmHg

| **Covariate** | **No Composite Outcome (N=582)** | **Composite Outcome (N=61)** | **OR (univariable)** | ***P* Value** | **OR (multivariable)** | ***P* Value** |
| --- | --- | --- | --- | --- | --- | --- |
| Age (years), mean (SD) |  |  |  |  |  |  |
| ≤85 | 551 (94.7) | 50 (82) |  |  |  |  |
| >85 | 31 (5.3) | 11 (18) | 3.91 (1.85-8.25) | <0.001 | 2.64 (1.16-5.99) | 0.020 |
| Duration of hypotension(min), n(%) |  |  |  |  |  |  |
| No hypotension | 327 (56.2) | 23 (37.7) |  |  |  |  |
| Short (<10 min) duration of hypotension | 167 (28.7) | 14 (23) | 1.19 (0.60-2.38) | 0.618 | 1.04 (0.51-2.14) | 0.908 |
| Prolonged (≥10 min) duration of hypotension | 88 (15.1) | 24 (39.3) | 3.88 (2.09-7.20) | <0.001 | 2.67 (1.36-5.23) | 0.004 |
| Diabetes, n(%) |  |  |  |  |  |  |
| No | 478 (82.1) | 40 (65.6) |  |  |  |  |
| Yes | 104 (17.9) | 21 (34.4) | 2.41 (1.37-4.26) | 0.002 | 2.11 (1.15-3.88) | 0.016 |
| STS score, n(%) |  |  |  |  |  |  |
| ≤7% | 494 (84.9) | 35 (57.4) |  |  |  |  |
| >7% | 88 (15.1) | 26 (42.6) | 4.17 (2.39-7.27) | <0.001 | 2.52 (1.36-4.69) | 0.003 |
| Previous stroke, n(%) |  |  |  |  |  |  |
| No | 549 (94.3) | 56 (91.8) |  |  |  |  |
| Yes | 33 (5.7) | 5 (8.2) | 1.49 (0.56-3.96) | 0.429 |  |  |
| Albumin, n(%) |  |  |  |  |  |  |
| ≥33 | 503 (86.4) | 45 (73.8) |  |  |  |  |
| <33 | 79 (13.6) | 16 (26.2) | 2.26 (1.22-4.20) | 0.009 | 1.82 (0.92-3.58) | 0.084 |
| Type of anaesthesia, n(%) |  |  |  |  |  |  |
| General anaesthesia | 183 (31.4) | 31 (50.8) |  |  |  |  |
| Deep sedation | 399 (68.6) | 30 (49.2) | 0.44 (0.26-0.76) | 0.003 | 0.67 (0.37-1.21) | 0.190 |

**MAP:** mean arterial pressure; **STS**: Society of Thoracic Surgeons; **OR:** Odds Ratio

**Table S11:** Multivariable regression analysis of risk factors for composite outcome in MAP <60 mmHg

| **Covariate** | **No Composite Outcome (N=582)** | **Composite Outcome (N=61)** | **OR (univariable)** | | ***P* Value** | **OR (multivariable)** | ***P* Value** |
| --- | --- | --- | --- | --- | --- | --- | --- |
| Age (years), mean (SD) |  |  |  |  | |  |  |
| ≤85 | 551 (94.7) | 50 (82) |  |  | |  |  |
| >85 | 31 (5.3) | 11 (18) | 3.91 (1.85-8.25) | <0.001 | | 2.59 (1.13-5.91) | 0.024 |
| Duration of hypotension(min), n(%) |  |  |  |  | |  |  |
| No hypotension | 409 (70.3) | 24 (39.3) |  |  | |  |  |
| Short (<10 min) duration of hypotension | 121 (20.8) | 20 (32.8) | 2.82 (1.50-5.27) | 0.001 | | 2.13 (1.09-4.18) | 0.027 |
| Prolonged (≥10 min) duration of hypotension | 52 (8.9) | 17 (27.9) | 5.57 (2.81-11.05) | <0.001 | | 4.20 (1.96-8.98) | <0.001 |
| Diabetes, n(%) |  |  |  |  | |  |  |
| No | 478 (82.1) | 40 (65.6) |  |  | |  |  |
| Yes | 104 (17.9) | 21 (34.4) | 2.41 (1.37-4.26) | 0.002 | | 1.94 (1.04-3.60) | 0.036 |
| STS score, n(%) |  |  |  |  | |  |  |
| ≤7% | 494 (84.9) | 35 (57.4) |  |  | |  |  |
| >7% | 88 (15.1) | 26 (42.6) | 4.17 (2.39-7.27) | <0.001 | | 2.58 (1.37-4.84) | 0.003 |
| Previous stroke, n(%) |  |  |  |  | |  |  |
| No | 549 (94.3) | 56 (91.8) |  |  | |  |  |
| Yes | 33 (5.7) | 5 (8.2) | 1.49 (0.56-3.96) | 0.429 | |  |  |
| Albumin, n(%) |  |  |  |  | |  |  |
| ≥33 | 503 (86.4) | 45 (73.8) |  |  | |  |  |
| <33 | 79 (13.6) | 16 (26.2) | 2.26 (1.22-4.20) | 0.009 | | 1.81 (0.91-3.61) | 0.090 |
| Type of anaesthesia, n(%) |  |  |  |  | |  |  |
| General anaesthesia | 183 (31.4) | 31 (50.8) |  |  | |  |  |
| Deep sedation | 399 (68.6) | 30 (49.2) | 0.44 (0.26-0.76) | 0.003 | | 0.77 (0.42-1.40) | 0.388 |

**MAP:** Mean arterial pressure; **STS**: Society of Thoracic Surgeons; **OR:** Odds Ratio.

STROBE Statement—Checklist of items that should be included in reports of ***cohort studies***

|  | **Item No** | **Recommendation** | **Page No** |
| --- | --- | --- | --- |
| **Title and abstract** | 1 | (*a*) Indicate the study’s design with a commonly used term in the title or the abstract | 1 |
| (*b*) Provide in the abstract an informative and balanced summary of what was done and what was found |  |
| **Introduction** | | | |
| Background/rationale | 2 | Explain the scientific background and rationale for the investigation being reported | 2-3 |
| Objectives | 3 | State specific objectives, including any prespecified hypotheses | 3 |
| **Methods** | | | |
| Study design | 4 | Present key elements of study design early in the paper | 6 |
| Setting | 5 | Describe the setting, locations, and relevant dates, including periods of recruitment, exposure, follow-up, and data collection | 6-7 |
| Participants | 6 | (*a*) Give the eligibility criteria, and the sources and methods of selection of participants. Describe methods of follow-up | 6 |
| (*b*)For matched studies, give matching criteria and number of exposed and unexposed |  |
| Variables | 7 | Clearly define all outcomes, exposures, predictors, potential confounders, and effect modifiers. Give diagnostic criteria, if applicable | 11-12,Table S1 |
| Data sources/ measurement | 8* | For each variable of interest, give sources of data and details of methods of assessment (measurement). Describe comparability of assessment methods if there is more than one group | 7-8 |
| Bias | 9 | Describe any efforts to address potential sources of bias | 11-12 |
| Study size | 10 | Explain how the study size was arrived at | 11-12 |
| Quantitative variables | 11 | Explain how quantitative variables were handled in the analyses. If applicable, describe which groupings were chosen and why | 11-13 |
| Statistical methods | 12 | (*a*) Describe all statistical methods, including those used to control for confounding |  |
| (*b*) Describe any methods used to examine subgroups and interactions | 11-13 |
| (*c*) Explain how missing data were addressed |  |
| (*d*) If applicable, explain how loss to follow-up was addressed |  |
| (*e*) Describe any sensitivity analyses |  |
| **Results** | | |  |
| Participants | 13* | (a) Report numbers of individuals at each stage of study—eg numbers potentially eligible, examined for eligibility, confirmed eligible, included in the study, completing follow-up, and analysed | 14,Figure 1 |
| (b) Give reasons for non-participation at each stage |  |
| (c) Consider use of a flow diagram |  |
| Descriptive data | 14* | (a) Give characteristics of study participants (eg demographic, clinical, social) and information on exposures and potential confounders | 14-15 |
| (b) Indicate number of participants with missing data for each variable of interest |  |
| (c) Summarise follow-up time (eg, average and total amount) |  |
| Outcome data | 15* | Report numbers of outcome events or summary measures over time | 14-18 |

| Main results | 16 | (*a*) Give unadjusted estimates and, if applicable, confounder-adjusted estimates and their precision (eg, 95% confidence interval). Make clear which confounders were adjusted for and why they were included | 15-16,Table 1-3 |
| --- | --- | --- | --- |
| (*b*) Report category boundaries when continuous variables were categorized |  |
| (*c*) If relevant, consider translating estimates of relative risk into absolute risk for a meaningful time period |  |
| Other analyses | 17 | Report other analyses done—eg analyses of subgroups and interactions, and sensitivity analyses | 17-18,Table 4-5,S4-S11 |
| **Discussion** | | | |
| Key results | 18 | Summarise key results with reference to study objectives | 22-23 |
| Limitations | 19 | Discuss limitations of the study, taking into account sources of potential bias or imprecision. Discuss both direction and magnitude of any potential bias | 22 |
| Interpretation | 20 | Give a cautious overall interpretation of results considering objectives, limitations, multiplicity of analyses, results from similar studies, and other relevant evidence | 18-22 |
| Generalisability | 21 | Discuss the generalisability (external validity) of the study results | 22 |
| **Other information** | | | |
| Funding | 22 | Give the source of funding and the role of the funders for the present study and, if applicable, for the original study on which the present article is based | 26 |

*Give information separately for exposed and unexposed groups.
